# Supplementary material for: LINE-1-like retrotransposons contribute to RNA-based gene duplication in dicots
Source: PubMed Central journal article supplement (PMC4838847; doi:10.1038/srep24755), 2016-04-21
Supplement: srep24755-s1.pdf [file srep24755-s1.pdf]

# Supplementary Information

LINE-1-like retrotransposons contribute to RNA-based gene duplication in dicots

Zhenglin Zhu<sup>1</sup>, Shengjun Tan<sup>2</sup>, Yaqiong Zhang<sup>2</sup>, Yong E. Zhang<sup>2,3</sup>

1. School of Life Sciences, Chongqing University, Chongqing 400044, China

2. Key Laboratory of the Zoological Systematics and Evolution & State Key Laboratory of Integrated Management of Pest Insects and Rodents, Institute of Zoology, Chinese Academy of Sciences, Beijing 100101, China

3. University of Chinese Academy of Sciences, Beijing 100049, China

This file consists of full materials and methods, supplementary tables and supplementary figures.

# Index

|                                                                             |    |
|-----------------------------------------------------------------------------|----|
| Methods.....                                                                | 3  |
| Identification and assembly of retroCNVs.....                               | 3  |
| RetroCNV genotyping in Arabidopsis accessions.....                          | 4  |
| LTR/LINE retrotransposon inference.....                                     | 5  |
| Identification of newly evolved retrocopies in dicot reference genomes..... | 6  |
| Supplementary Tables .....                                                  | 7  |
| Table S1.....                                                               | 7  |
| Table S2.....                                                               | 8  |
| Table S3.....                                                               | 9  |
| Table S4.....                                                               | 11 |
| Table S5.....                                                               | 12 |
| Supplementary Figures .....                                                 | 13 |
| Figure S1.....                                                              | 18 |
| Figure S2.....                                                              | 22 |
| Figure S3.....                                                              | 26 |
| Figure S4.....                                                              | 27 |
| Figure S5.....                                                              | 30 |
| Figure S6.....                                                              | 31 |
| Figure S7.....                                                              | 33 |
| Figure S8.....                                                              | 35 |
| Figure S9.....                                                              | 37 |
| Figure S10.....                                                             | 38 |
| Figure S11.....                                                             | 39 |
| Figure S12.....                                                             | 40 |
| References in the Supplementary Information.....                            | 41 |

## Methods

### Identification and assembly of retroCNVs

We identified retroCNVs in *Arabidopsis* (*Arabidopsis thaliana*) by integrating several published retroCNV identification strategies (Fig. 2)<sup>1,2</sup>. Specifically, we downloaded the fastq-format Illumina sequencing data of 18 *Arabidopsis* accessions, with sequencing coverage ranging from 27-fold to 36-fold and read length ranging from 36 to 51 bp<sup>3</sup>. We split all paired-end reads into single reads to retain cases of retroposition in which one read is mapped to the parental locus and its partner is mapped to the insertion site. We also retrieved the reference genome and gene annotations from TAIR10<sup>4,5</sup>. We mapped reads against the exon-exon junction library (200 bp) using NovoAlign (version 2.08, [www.novocraft.com](http://www.novocraft.com)) with the parameters “-o Softclip -r All 10 -s 1”, which allows up to the top 10 alignment hits for one read and enables automatic trimming at two ends. For reads with more than one hit, we kept reads with differences in their alignment scores of greater than 5 and with identities greater than 5% between the top 1 and 2 alignment positions. In this way, we excluded all multi-mapping reads, *i.e.*, reads that mapped to more than one location equally well. Then, we pulled out reads that uniquely mapped to the exon-exon junctions after removing reads generated by PCR duplication using Picard ([picard.sourceforge.net](http://picard.sourceforge.net)). We called an event retroposition or intron loss if there were at least three reads from one accession spanning the exon-exon junctions with an overhang ( $\geq 10$  bp). The introns of parental genes are present during retroposition but are absent during intron loss. Thus, in the case of retroposition, we expected to detect reads that mapped to both exon-intron and intron-exon junctions, suggesting the existence of parental introns. On this basis, we further selected cases in which at least three reads spanned the exon-intron or intron-exon junctions with an overhang ( $\geq 10$  bp). After applying these two filtering steps, we identified candidate retroCNVs in *Arabidopsis* accessions.

In contrast to previous efforts<sup>1,2</sup>, we next performed targeted *de novo* assembly. We

collected reads that were uniquely mapped to exon-exon junctions and the 500-bp flanking regions of the parental genes. We assembled these reads using MIRA<sup>6</sup>, which is able to recognize differences between parental and retro copies, including SNPs and intron deletions. Afterwards, we retrieved exon-exon junction-spanning sequences with 20 bp on each side and used BLAT<sup>7</sup> to align these 40-bp sequences against contigs assembled by MIRA. Given the output, we further extracted candidate retroCNVs that covered the junctions with both identity and coverage higher than 95%. Then, we mapped all retroCNVs against the genome using BLAT on the Arabidopsis Genome Browser ([epigenomics.mcdb.ucla.edu](http://epigenomics.mcdb.ucla.edu)) and retained only those cases with the hallmark of intron loss compared with the presumed parental gene. Finally, for these retroCNVs, we implemented the PRICE package<sup>8</sup> to extend the flanking regions by searching and merging reads aligned to the contigs generated by MIRA. We were able to assemble the flanking regions of four retroCNVs. For each retroCNV, we took the longest contig (median length, 528 bp) in one accession as the template for downstream mechanistic analyses. All the reads mapping to retroCNVs and their insert sites, especially those spanning exon-exon junctions, and the breaking points between retroCNVs and flanking regions are shown in Fig. S2, S3, S5 and S7 (Panels D-F).

### **RetroCNV genotyping in Arabidopsis accessions**

Next, we employed a conservative approach to determine the presence/absence of the four retroCNVs across the 18 accessions (Fig. S12). Specifically, we mapped the reads of the different accessions onto the reference genome as well as the template retroCNVs using NovoAlign ([www.novocraft.com](http://www.novocraft.com)) with the aforementioned parameters “-r All 10 -s 1”. We extracted the reads that were uniquely mapped to retroCNVs and used BLAT<sup>7</sup> to align these reads against the retroCNVs and the corresponding parental genes. We retained reads that mapped to the retroCNVs with at least 95% coverage and that had higher identity than when mapped to the parental genes. If at least two reads mapped better to the retroCNVs, we again assembled these reads into longer contigs using MIRA<sup>6</sup>. We then searched the contigs against the

retroCNVs and the reference genome using BLAT<sup>7</sup>. If the retroCNV produced a better alignment, we classified it as presence in this accession.

In parallel, given that the 3' breakpoint may be disturbed by polyA sequences, we extended the 5' breakpoint of the retroCNV of interest by 50 bp and used the spanning 100-bp sequence to search reads in the 18 accessions. We then assembled the mapped reads using MIRA<sup>6</sup>. If we generated a contig that spanned the 5' breakpoint, we classified this as the presence of the insertion site.

Overall, we conservatively assigned the presence of retroCNVs across accessions by requiring both the presence of the retroposed region and the corresponding 5' breakpoint sequences. In other words, the population frequency in Table S1 represents a lower-bound estimation.

### **LTR/LINE retrotransposon inference**

To infer whether the flanking regions of retroCNVs and recently evolved retrocopies encoded by the reference genomes consist of LTR/LINE retrotransposons, we used RepeatMasker ([www.repeatmasker.org](http://www.repeatmasker.org)) to search a customized repeat library. Considering the issue of incomplete annotation, this library not only included known plant retrotransposons listed in Repbase<sup>9,10</sup> and TIGR<sup>11</sup> but also covered retrotransposons predicted in the reference genomes of Arabidopsis and the cassava, *Manihot esculenta* (*M. esculenta*) (version 4.1)<sup>12</sup> by two *de novo* strategies based on MGEScan-LTR<sup>13</sup> and MGEScan-nonLTR<sup>14</sup>. We clustered all repeat elements via CD-HIT<sup>15</sup>, with an identity cutoff of 80%, considering that in MGEScan-LTR, the identity cutoff of the upstream and downstream long terminal repeat was set at 80%<sup>13</sup>. Based on our comprehensive and non-redundant repeat library, we scanned for repeat elements using RepeatMasker with the parameter “-s” to increase the sensitivity. Given that the retroelement structure could rapidly degenerate<sup>16</sup>, we specified relatively relaxed criteria: coverage > 50% or mapped length > 150 bp, divergence < 50% and SW score > 250.

## Identification of newly evolved retrocopies in dicot reference genomes

As in the case of retroCNVs, we again searched for the hallmark of intron loss and identified retrocopies encoded by *Arabidopsis* and the *M. esculenta* (version 4.1). For both species, we first extracted exon-exon junction sequences by extending 20 bp beyond the junction. Then, we aligned these sequences against the reference genome via BLAT. We extracted the possible segments of candidate retrocopies by only retaining alignments with a single block, suggesting an intron loss event. Moreover, because we were interested in recently evolved retrocopies, we required that the alignment showed high identity ( $\geq 95\%$ ) and high coverage ( $\geq 95\%$ ). Given these short alignments indicating intron loss, we further extended the boundaries of each candidate retrocopy and its corresponding parental gene by 1,000 bp and aligned them using BLAT. We reiterated this step until we could no longer extend the alignment. After this step, we inferred the breakpoint of the retrocopy and the insertion site.

For all candidate retrocopies, we performed the following two filters. First, there were cases with one parental gene and multiple paralogous retrocopies that may represent secondary DNA-level duplications of the first retrocopy. Thus, we only kept the retrocopy with the highest similarity to the parental gene (*i.e.*, the one with the highest BLAT score). Second, we manually checked the candidate retrocopies by mapping them onto the reference genome using BLAT on the Arabidopsis Genome Browser ([epigenomics.mcdb.ucla.edu](http://epigenomics.mcdb.ucla.edu)) and only retained the entries that showed spliced alignment against the corresponding parental genes. We genotyped 10 recently evolved retrocopies in the 18 *Arabidopsis* accessions by searching these retrocopies in the assembled genomes of the 18 accessions<sup>3</sup> via BLAT<sup>7</sup>.

## Supplementary Tables

**Table S1.** Genotyping of retroCNVs across 18 accessions.

The name of each retroCNV is represented by “RC\_” (short for retroCNV) followed by its parental gene accession. “Y” denotes presence, whereas “N” denotes absence.

| RetroCNV       | Bur-0 | Can-0 | Ct-1 | Edi-0 | Hi-0 | Kn-0 | Ler-0 | Mt-0 | No-0 | Oy-0 | Po-0 | Rsch-4 | Sf-2 | Tsu-0 | Wil-2 | Ws-0 | Wu-0 | Zu-0 |
|----------------|-------|-------|------|-------|------|------|-------|------|------|------|------|--------|------|-------|-------|------|------|------|
| RC_AT3G06040.1 | N     | Y     | N    | N     | Y    | N    | N     | N    | N    | N    | N    | N      | Y    | N     | N     | N    | N    | N    |
| RC_AT3G08580.2 | N     | N     | N    | Y     | Y    | Y    | N     | Y    | Y    | Y    | Y    | Y      | Y    | Y     | Y     | Y    | Y    | Y    |
| RC_AT5G58720.1 | N     | N     | N    | N     | N    | N    | N     | N    | N    | Y    | Y    | N      | N    | N     | N     | N    | N    | Y    |
| RC_AT5G51410.1 | N     | N     | N    | N     | N    | N    | N     | N    | Y    | N    | N    | N      | N    | N     | N     | N    | N    | N    |

**Table S2.** The length (bp) of the assembled retroCNVs and their flanking regions.

| RetroCNV       | Retrocopy | 5' flanking region | 3' flanking region |
|----------------|-----------|--------------------|--------------------|
| RC_AT3G06040.1 | 627       | 597                | 1,321              |
| RC_AT3G08580.2 | 1,019     | 556                | 27                 |
| RC_AT5G58720.1 | 418       | 500                | 661                |
| RC_AT5G51410.2 | 60        | 488                | 500                |



**Table S3.** Newly evolved retrocopies encoded by the Arabidopsis reference genome.

The convention largely follows Table 1 in the main text. “Reported” denotes whether the retrocopy is identified previously<sup>17-19</sup>. Only the retrocopy derived from the parental gene AT5G37150.1 is associated with LTR retrotransposon at two sides. Another three cases associated with a polyA tail but not LTR retrotransposons were possibly driven by an L1-like mechanism. The remaining six cases are associated with either a previously undescribed mechanism or with an LTR or L1-like mechanism in which the sequence signatures have already degenerated over evolutionary time. Thus, we called these cases “uncertain” in the last column. After aligning the sequences between the retrocopy and its corresponding parental gene on the basis of reading frame of the later, we calculated non-synonymous substitution rate ( $Ka$ ) and synonymous substitution rate ( $Ks$ ) via the codeml program in the PAML package<sup>20</sup>. We then performed the likelihood ratio test on whether  $Ka/Ks$  is significantly smaller than 0.5<sup>21</sup>. Such a conservative criteria ensured that the retrocopy must be under constraint even the parental locus is neutrally evolving with a  $Ka/Ks$  of 1.

| PG          | Locations                  | Reported | Flank   | PolyA | TSD | TTAAAA | Mechanism | <i>Ka</i> | <i>Ks</i> | <i>Ka/Ks</i> | <i>P</i> -value |
|-------------|----------------------------|----------|---------|-------|-----|--------|-----------|-----------|-----------|--------------|-----------------|
| AT1G05890.1 | Chr1(+): 23655643-23657487 | Y        |         | Y     | N   | N      | L1-like   | 0.058     | 0.087     | 0.662        | 0.356           |
| AT1G17780.2 | Chr2(+): 7184534-7185341   | N        |         | N     | N   | N      | uncertain | 0.045     | 0.107     | 0.420        | 0.436           |
| AT1G50010.1 | Chr4(-): 8548602-8550668   | N        |         | N     | N   | N      | uncertain | 0.002     | 0.297     | 0.007        | 0.000           |
| AT1G60170.1 | Chr3(-): 22403267-22404967 | Y        |         | N     | N   | N      | uncertain | 0.000     | 0.000     | NA           | 0.954           |
| AT2G45330.1 | Chr5(+): 7956005-7956655   | Y        |         | N     | N   | N      | uncertain | 0.021     | 0.094     | 0.224        | 0.030           |
| AT3G23100.1 | Chr1(-): 22658630-22659475 | Y        |         | N     | N   | N      | uncertain | 0.028     | 0.161     | 0.176        | 0.003           |
| AT4G01590.1 | Chr4(+): 16919126-16919798 | Y        |         | N     | N   | N      | uncertain | 0.060     | 0.144     | 0.415        | 0.491           |
| AT4G21660.1 | Chr1(+): 3873203-3873861   | N        |         | Y     | N   | N      | L1-like   | 0.031     | 0.028     | 1.116        | 0.270           |
| AT4G31900.1 | Chr4(-): 7356209-7359090   | N        |         | Y     | Y   | N      | L1-like   | 0.138     | 0.102     | 1.355        | 0.037           |
| AT5G37150.1 | Chr5(-): 21167349-21169533 | Y        | LTR/LTR | N     | N   | N      | LTR       | 0.0171    | 0.0516    | 0.332        | 0.090           |

**Table S4.** Genotyping of recently evolved retrocopies in the 18 accessions.

The name of each retrocopy is represented by “R\_” (short for recently evolved retrocopy) and its parental gene. “Y” denotes presence, whereas “N” denotes absence.

| Retrocopy     | Bur-0 | Can-0 | Ct-1 | Edi-0 | Hi-0 | Kn-0 | Ler-0 | Mt-0 | No-0 | Oy-0 | Po-0 | Rsch-4 | Sf-2 | Tsu-0 | Wil-2 | Ws-0 | Wu-0 | Zu-0 |
|---------------|-------|-------|------|-------|------|------|-------|------|------|------|------|--------|------|-------|-------|------|------|------|
| R_AT1G05890.1 | Y     | Y     | Y    | Y     | Y    | Y    | Y     | Y    | Y    | Y    | Y    | Y      | Y    | Y     | Y     | Y    | Y    | Y    |
| R_AT1G17780.2 | Y     | Y     | Y    | Y     | Y    | Y    | Y     | Y    | Y    | Y    | Y    | Y      | Y    | Y     | Y     | Y    | Y    | Y    |
| R_AT1G50010.1 | Y     | Y     | Y    | Y     | Y    | Y    | Y     | Y    | Y    | Y    | Y    | Y      | Y    | Y     | Y     | Y    | Y    | Y    |
| R_AT1G60170.2 | Y     | Y     | Y    | Y     | Y    | Y    | Y     | Y    | Y    | Y    | Y    | Y      | Y    | Y     | Y     | Y    | Y    | Y    |
| R_AT2G45330.1 | Y     | Y     | Y    | Y     | Y    | Y    | Y     | Y    | Y    | Y    | Y    | Y      | Y    | Y     | Y     | Y    | Y    | Y    |
| R_AT3G23100.1 | Y     | Y     | Y    | Y     | Y    | Y    | Y     | Y    | Y    | Y    | Y    | Y      | N    | Y     | Y     | Y    | Y    | Y    |
| R_AT4G01590.1 | Y     | Y     | Y    | Y     | Y    | Y    | Y     | Y    | Y    | Y    | Y    | Y      | Y    | Y     | Y     | Y    | Y    | Y    |
| R_AT4G21660.1 | Y     | Y     | Y    | Y     | Y    | Y    | Y     | Y    | Y    | Y    | Y    | Y      | Y    | Y     | Y     | Y    | Y    | Y    |
| R_AT4G31900.1 | Y     | Y     | Y    | Y     | Y    | Y    | Y     | Y    | Y    | Y    | Y    | Y      | Y    | Y     | Y     | Y    | Y    | Y    |
| R_AT5G37150.1 | Y     | Y     | Y    | Y     | Y    | Y    | Y     | Y    | Y    | Y    | Y    | Y      | Y    | Y     | Y     | Y    | N    | Y    |

**Table S5.** Newly evolved retrocopies encoded by the *M. esculenta* reference genome.

The convention follows Table 1. LTR retrotransposons could be identified in only one side for three cases. Another four cases associated with the polyA tail but not LTR retrotransposons were possibly driven by an L1-like mechanism. The remaining six cases are associated with either an undescribed mechanism or with an LTR or L1-like mechanism in which the sequence signatures have already degenerated over evolutionary time.

| Retrocopy            | Parental gene             | Location                          | Flank | PolyA | TSD | TTAAAA | Mechanism |
|----------------------|---------------------------|-----------------------------------|-------|-------|-----|--------|-----------|
| R_cassava4.1_000716m | <i>cassava4.1_000716m</i> | scaffold12341(+): 19473-21103     | /LTR  | N     | N   | N      | LTR       |
| R_cassava4.1_000867m | <i>cassava4.1_000867m</i> | scaffold02865(+): 83962-85172     | LTR/  | N     | N   | N      | LTR       |
| R_cassava4.1_001372m | <i>cassava4.1_001372m</i> | scaffold12746(-): 404-1682        |       | N     | N   | N      | uncertain |
| R_cassava4.1_002584m | <i>cassava4.1_002584m</i> | scaffold02658(-): 984514-985182   |       | N     | N   | N      | uncertain |
| R_cassava4.1_006936m | <i>cassava4.1_006936m</i> | scaffold07238(+): 538800-540305   |       | Y     | Y   | Y      | L1-like   |
| R_cassava4.1_007181m | <i>cassava4.1_007181m</i> | scaffold06700(+): 141611-141969   | LTR/  | N     | N   | N      | LTR       |
| R_cassava4.1_012117m | <i>cassava4.1_012117m</i> | scaffold06582(-): 853091-854334   |       | Y     | N   | N      | L1-like   |
| R_cassava4.1_012226m | <i>cassava4.1_012226m</i> | scaffold00325(-): 525590-526615   |       | N     | N   | N      | uncertain |
| R_cassava4.1_015105m | <i>cassava4.1_015105m</i> | scaffold07329(-): 35740-36636     |       | Y     | N   | N      | L1-like   |
| R_cassava4.1_018827m | <i>cassava4.1_018827m</i> | scaffold00847(-): 1619684-1620083 |       | N     | N   | N      | uncertain |
| R_cassava4.1_019865m | <i>cassava4.1_019865m</i> | scaffold08617(-): 71499-72052     |       | Y     | Y   | Y      | L1-like   |
| R_cassava4.1_019883m | <i>cassava4.1_019883m</i> | scaffold00847(-): 1619720-1620130 |       | N     | N   | N      | uncertain |
| R_cassava4.1_033677m | <i>cassava4.1_033677m</i> | scaffold10563(-): 1366705-1367705 |       | N     | N   | N      | uncertain |

## Supplementary Figures

**A**

TCCGTTATCTCCGCCGAACCATCCATCCTCCGCTACTTCATCTCCGCCGCTGAGATCGGAATCAC  
TATCCCACTCCATTTGATTTTGCATACACACCCACAAAATAAAGCTTAAGACTGCCACGAATCT  
TCTTCCTCAGCGACAGGAGAAGAGACCCAGAAGAACACAGTTTGATTTTGAATCGCGGAATCTGA  
TATCTGTAGGTAATCGAAGTCTCCACAGGAAAAAGTTCAAACCTTAGACAAACCCAGAAATCGT  
CTTCTTCAAGAACAGGAGACAGAAGAACAGATTTTGAATGGAATCAAGCGAAGGAAAGAGGAAT  
CTGATATTTGTAGGTAATGGAAGTCTCCACCGCCCACTTCTAAGAGGAGGAGAAGAAGAAGAGAG  
ATGATTCGGTCGCTCGATGACTCGGCTCTTCTCAGTGCCTCTCCTTTTCCATCTTTAACCAGACC  
GGTTTCTTAATTTTACCTTACCGTTTAGTTTATTTATCCGGTTTACACAAAA **TATCCTGTAAGT**  
**TCCTTGAG**ATTTTTTTGGTTTTACCAAATGAGTGTATTAGAATCAATTTTAAATGATTTAGAAA  
CATTAGAAACATCGTGACTCAGCTCCGTCTCTCACTGTAATAATCAAGTCAGAGCCGACGAAGTT  
GACGTTTGGCGCCGTCGGAGGAGAGTTTTTACTGTTGCTGTCCAGTTGACATTTTGAGACATGAAA  
TGATCTGGGGTTGATGTTTGTATGGTAACAGAGGAATTATAGTCATGAAGCTTATTTCACTTGTC  
AGAAACGTTTCGTTCTCGCCAATGTCAACCGGAAGTTATCTGGTCTTTGCAAGTTCGTTTCTTGCA  
GCAAGATTCTGTCTCGAAAGCTAAACCCAAGAAATACAAACACCCGT**CAGTTTATGATCCGTATG**  
**GTC**CTAGACCCCAGCCTTCAAGCAAATCATGGAGCTAGCTGAGCGTATAGCTGCATTATCTCCA  
GAAGAAAGAAAACAGATTGGTCCTGCTCTCAATGAACACCTGAGGCTTCCAAAACAACAGATGAT  
TTCATCGGA**CGGATTGGAGCAAACAAGATACG**GAGCTGGGAATGTAGAGGAGAAGAAGGAGAAG  
ACGGCTTTCGATGTGAAGTTGGAGAAGTTTAAATGCATCTGATAAGATCAAAGTGATAAAAGAAGT  
TAGAACGTTTACAAGTTTGGGTCTGAAGGAAGCGAAAGAGCTTGTGGAGAAAGGATAATAGTCTT  
TTTCTACTTTTCGATCTCAAAAATACTAAAAAGTGAAGCCTTGTAATCTTCTTTAAAGAGTAGA  
AACATGTATTATTATCTTTTAGTTATTCATCTTCAAAGTTTTGATTAATTTAAAGTGAATGAAAT  
ATAAATTCAATACAAAAAAGAAGAAACCCAAATCTACAAAAGAAAAAAGAAAAATATATAATT  
GATTTAGGATTCTAAATTCTCACGACTCGGAGAGCAAGCCGTTGAATAGACTGATCATCGAAGC  
AAGGATCAAAGGTCTTAATCTTGGACACAAAATCCATAGCTTCACTATACTTCCCTGCTCTGCAA  
TAACCATCTACTACCATTTTAAAAGTCAGCTCATTTGGTCTGCAATC**ATTCTTCGCCATGCACTC**  
**AATCAC**ATCTTCTATCTCTGCAAACATTCCCATCGCCGTGAACCCGAAACAAACGTGTTGTAAG  
TGAAAATGCACGGTCTGATTCCTCGCTCTGTCATCTCAGACAGCATCCTAACCGCTTCTTGATC  
AACCTCTTCTGCAGAAACCTTTGATCACTGTGTTGTAAGAGACCAGGTCCGGTTTTAACTGCGA  
TTTTTCTAGAGTCTTGAGGATTTCTTCGGCTTCCAACACTCTCCTCTTACGTACATGTCCA  
TCAGG

## B

TTATATGATAACATTCCCTAAATTTTCAAAGGTGTCTATCAATCTATAAAAACCATGATTACTTTCT  
GAAACCTTCCAGAAATTTACTAAAAACATGTTGTTCCCTAGATACTTTTGAGTTTTGACACAATGA  
CGACCATTCCTATATCTTTTTGTAAGATACTCTAGTAGTCTAGTCCTACTGTCTCGATCTTCTATT  
AAATCTTTAAGTATAGAAGATCCAAGTAACTTACATATAGTTAATAGAAGATCCAAGTAAGATC  
AAAGCCAATAATATTAATTTATATAAAAAAAATTTGTA AACACTGTTTTTTTTTTCAATTGATG  
AAAGGAAAAAAGCATT CAGGAATTGTTTTATTTTTATTTTTTTGTTAACATTCATTTATTTAAA  
TTGCATAAGAAAAGAAAAAGTGATAACCATTGCCAGAAACAAAGGTATAGAGAATGTGGTAACC  
ATTGATCTGCATGGTCAGCATGTTAAACCAGCAATGAAGCTACTGAAGCTACATCTGTTATTTGG  
ATCATATGTTCCAGCCATTCAGACTCTACGAGTGATCACAGGATGTGGAGCTTCTGGGTTTGGGA  
AGTCTAAGGTGAAACAATCAGTGGTAAAGCTGCTAGAAAGAGAAGGAGTTAGGTATTGTGAAGAG  
AACAGAGGCACACTGCTGATCAAGCTTGACGGAGGTAGTAGAGCTTCAGTTTCTTAGACACAGA  
GAGTGACTCTGATGAATAAGTGATAACTAAAACCTAAAGTCAGGTTTTAGCTTTAGATCTTAAAAT  
TTATGTCGATTTTGCCTATATCTGATGCTAGCTCTCTGTTGTTAAGTAAATGTTGAGCAAAAAAA  
AAAAAAGTTAACAAGCCTTAGACAAAAAATTAAAGGCCCAATAACGAAAGTTGAACTGTAAAGA  
AACGAAATATAACTAGTTGTAGAATTGTATATATAGGATAGCTAGTAAAAAAGAGTGGTTGTTCT  
GTA ACTACAATCATT TATTTTTTTTTGTTGACATTCGTAATCATTGTAACATACGA

C

AATGTTGGCGACCCACAACCCCAATGCGTTTCCAACACATTCAAAGCTGACAGTTTGACAAATT  
GTGAAAGGTCACATCAACTTGACAAAGAGATTCAATTCCTTTGCCACTTTTGAATTATTTATATG  
TAATTTCTTTCTTTTCCATAAAAAAAAAACTATGAGGTAGAAAAACAAGATCTGGGTTTCTCTT  
ATAGAAACCCTGATTCCAACCTAACTGTCTTCAGATTACACGTTTCAAGTGACTTTGCATGTGA  
TCGTGATAATATTTTAAATTATTATTTTTTTATTTTAGCATATGCTCCCACAACAATCTGTGACA  
CTATCACACTAACATTAATATTTAAAAGCACAAACATGTCAATCATATATACGGTCTTATTCGCAAG  
TCCTGTGATAGAACTTTTCTTCTCAGGTAGAGGAAACCAACCTTTCATTTGTTCTTGAACCTGA  
AAAGTAAAAAACAATCGAAATTAAGCTCGTCAGTGTTACATCGTTTAATTAGAGCCGTTATTC  
GTGACTTACACTGATACCATATTAGAGTGTGGGCTTCCAACCTAAAACCAATTGGCAATAGGTGG  
AGAGGCCCATATCTTATATATACCACTTAAGATCCTACTCAACTCCGATGTGGGACATTGTCCC  
TAATACGCCCCCTCGAGATGATGGCTCTTAGCCATTGATCTCGATATGTTTGGGCATGGATCG  
GCGGGCCAAGTATTGGGCCGACCGATGTGGATCGGTTGAGTATGTGCGGATCGGGCTCTGATA  
CCATATTAGACTGTGGGCTTCTACACCACAGAAAAACTTCGTCTCTCTTCTCTGCTTCGCCCTC  
TCATTTCTGTGAGATAAAGGCGGAGTCTCTCTCAATTATTTTGTCTATCCATCGATTCTTAGA  
GTTCAAATGGTTGATCAAGTTCAGCACCCACTATTGCGCAGAAAGCTGCCGGCAGTTCATGC  
GTTCAAGTGTTCCAAGGACGTTCAAGTGGGTTACCAGAGGCCTTCTATGTATCAAAGACATGCA  
ACCTACGGAACTACTCCAATGCTGCATTTCAATTTCTCCCACATAGGAGAGAAGGGGTTCACT  
AACTTTGCCCTTGACTTTCTGATGGGTGGTGTCTGCTGCCGTCTCCAAGACTGCTGCTGCTCC  
TATTGAACGTGTTAAGCTTTTGTCCAGAACCAGGATGAGATGATTAAGCTGGCAGGCTTTCTG  
AACCTACAAGGGTATTGGTGACTGTTTCGGCAGGACGATTAAAGGATGAAGTTTGGTTCTCTA  
TGGAGAGGCAACACTGCCAATGTTATCCGTTATTTCCCACTCAGGTTTGTGAGTTTCATACTC  
TTTCTTGTATAGCTTTTGA AAAAACATAATTTGTGCTAACCTTCTTTTTTGTCTATTGTAGGC  
CTTGAACTTTGCCTTCAAAGATTACTTCAAAGACTTTTCACTTTAAGAAGGACAGAGATGGTT  
ACTGGAAGTGGTTTGTGTTAACTTGGCATCTGGAGGAGCAGCTGGTGCCTCTTCCCTTCTGTTT  
GTGACTCCCTTGACTATGCCCCTACCCGTCTAGCTAATGATGCCAAGGCTGCAAAGAAAGGAGG  
TGTTGGAAGACAGTTTGTGTTCTTGTGATGTCTACAGAAAGACACTTAAGACTGATGGTATTG  
CTGGTCTGTACCGTGGATTCAACATCTCATGTGTTGGTATCATTGTCTACCGTGGTCTGTACTTT  
GGACTCTATGACTCTGTGAAGCCTGTTCTCCTCACTGGTGACTTACAGGTATGTCTTGTGCTT  
TCATTTATATCTGTAAGGTGACAGCTTAA

## D

TTAACACAACAAAAAGGTTGTTGCATGGAAGATTTTTACCGTTGTTTGTCTTGAAGTGAAT  
TTAATGTCTGGCTCCACTTTTTGTGTCAATTTCTTCTAAGAATAAAACAAAAAGGAAAAGGA  
GAAGCAATTGCATTGAAGTGGTGAACAAAATTAATTTCTCAACATCAAAGTTGATGACTTCATAC  
ATATAATTTACACCTAAGAGACTAATTTGACACTGTTAGCAAAAATAAAAATCAAACCTTCATC  
ATGGTCAACTCTTAATTAATAATCTATCTAGATATTTATATGTAGTGTTGTTGTTTTAAGA  
AAACTAAATATCAAGAAAAGAAATAAGTTTGAAACGGAGCCGAGAAAAAACAGGGTTTACAGT  
TTGATATAACACCGTATCGATGGGGTGTGAAGTATAATGTTTTGATAATTACCAATCATAAAGC  
ATTATTAATAATCGATATTTTCGGCTTAATTTGTGCTTGGGGCCAGGAACCTTGCAAATTAATG  
AGCTATTCTAAGAGTTTGAGACCTTACCACCACTACTTTGTAACGTTTTAACTATTTTTATCG  
TTTGCCGCTAAACAGTTTATATCGTTTTGTGTTATCCGTCAGACCCTAAAACTAAAATGGAAA  
AATACAAGTTAACTTGTACATTACGTATGAGGAAGAGACATTATAATTTGAGCAAAAATATGAC  
AGTTTTAGGGCACGATGCTAGAGGAAAGAGATTCAAGTAAAGGTATGTCAATTTAGGTTTAAAA  
TGAGATTTGGTATAATAATTTCTTAATTGTTTTGACACTACAAGAAATATCCACATTCTTAGCA  
AGTTAGAAGCGCTGATTTGTTTATCCACATTATTTATAATAGTTTGATTTGCTATAATAATTTT  
CTTAATAATTTGAAAAAAATGTTATCACATAGAACTGTAATCACTATAAATAAAAATCATGA  
TCCTTTTTATCCTATCATTTAGTTATAGAAATTAAGTTCTTAGATTCTTAAAAAGCATAGTAT  
TAGAATAA



E

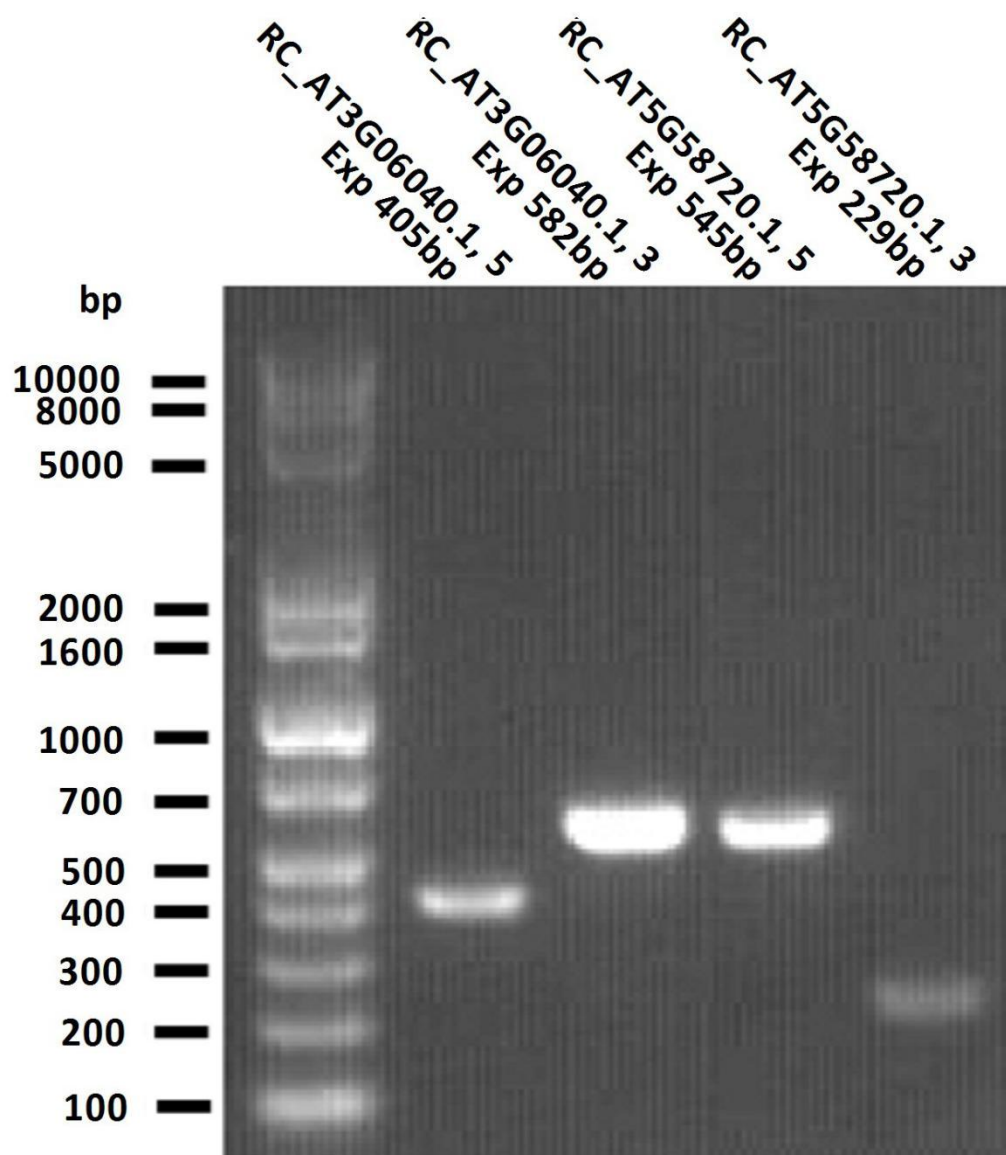

F

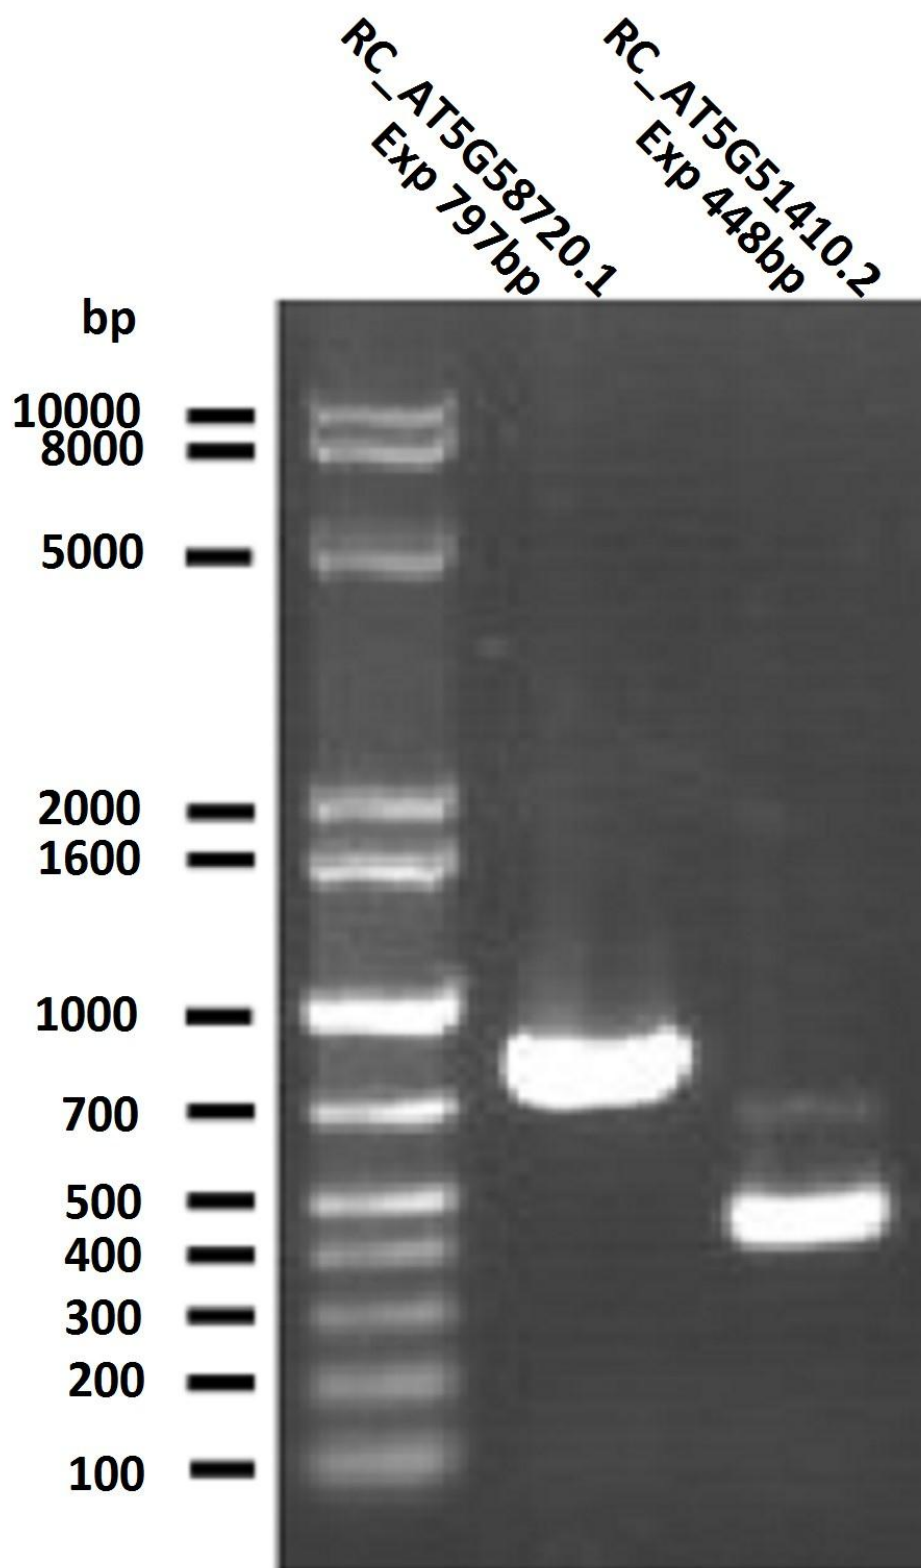

**Figure S1.** Assembled sequences and validation of retroCNVs in Arabidopsis.

Panels A and B show retroCNVs derived from AT3G06040.1 and AT5G58720.1, which were assembled in the accessions Can-0 and Oy-0, respectively. The underlined sequence shows the retrocopy. For each retroCNV, we designed two pairs of primers (forward primer, dark blue; reverse primer, light blue) to amplify the sequences colored in red to validate the linkage of the 5' flanking region, retroCNV and 3' flanking region. Similarly, Panels C and D indicate retroCNVs derived from AT3G08580.2 (No-0) and AT5G51410.2 (No-0), respectively. In these two cases, only one suitable pair of primers could be designed, which spanned from the 5' flanking region to the 3' flanking region. These two panels were similarly marked following A and B. Panels E and F show the PCR results performed in accessions in which four retroCNVs were initially assembled (Table 1). In E, "RC\_AT3G06040.1, 5" and "RC\_AT3G06040.1, 3" correspond to the amplified sequence at the 5' end and that at the 3' end of RC\_AT3G06040.1, respectively. Similarly, "RC\_AT5G58720.1, 5" and "RC\_AT5G58720.1, 3" show two sides of "RC\_AT5G58720.1, 3". Finally, Panel F shows the amplified fragment derived from "RC\_AT3G08580.2" and "RC\_AT5G51410.2", respectively. For both Panel E and F, "Exp" denotes the expected length of amplified segments. For all cases, the lengths of all amplified fragments are consistent with the expected length inferred according to the aforementioned sequences (Panels A-D).

A.

ACTTTGCATGTGATCGTGATAATATTTTTAATTATTATTTTTTATTTTAGCATATGCTCCCACA  
ACAATCTGTGACACTATCACACTAACATTAATATTA AAAAGCACAAATGTCAATCATATATACGG  
TCTTATTCGCAAGTCTGTGATAGA ACTTTTCTTCTCAGGTAGAGGAAACCAACCTTTCATTTGT  
TCCTTGAAACTGAAAAGTAAAAAACAATCGAAATTAAGCTCGTCAGTGTTACATCGTTTAATT  
AGAGCCGTTATTCGTGACTTACACTGATACCATATTAGAGTGTGGGCTTCCAACCTAAAACCAAT  
TGGCAATAGGTGGAGAGGCCCATATCTTATATATACCACTTAAGATCCTACTCAACTTCCGATGT  
GGGACATTGTCCTAATACGCCCCCTCGAGATGATGGCTCTTCTAGCCATTGATCTCGATATGTT  
TGGCATGGATCGGCGGGCCAAGTATTGGGCCGGACCGATGTGGATCGGGTTGAGTATGTGCGGA  
TCGGGCTCTGATACCATATTAGACTGTGGGCTTCTACACCACAGAAAAA ACTTCGTCTCTTCT  
CTGCTTCGCCCTCTCATTTCTGTGAGATAAAGGCGGAGTCTCTCTCCAATTATTTTGCTCATCC  
ATCGATTCTTAGAGTTCAAAATGGTTGATCAAGTTCAGCACCCCACTATTGCGCAGAAAGCTGCC  
GGGCAGTTCATGCGTTCAAGTGTTC AAGGACGTTCAAGTGGGTTACCAGAGGCCTTCTATGTA  
TCAAAGACATGCAACCTACGGAACTACTCCAATGCTGCATTTCAATTTCTCCACATAGGAGA  
GAAGGGGTTACTAACTTTGCCCTTGACTTTCTGATGGTGGTGTTCCTGCTGCCGTCTCCAAGA  
CTGCTGCTGCTCCTATTGAACGTGTTAAGCTTTTGATCCAGAACCAGGATGAGATGATTAAGCT  
GGCAGGCTTTCTGAACCTACAAGGGTATTGGTGA CTGTTTCGGCAGGACGATTAAGGATGAAGG  
TTTTGGTCTCTATGGAGAGGCAACACTGCCAATGTTATCCGTTATTTCCCCTCAGGTTTGTT  
GAGTTTCATACTCTTTCTTGTATAGCTTTTGAAAAACATAATTTTGCTAACCTTCTTTTTT  
GTCTATTGTAGGCCTTGA ACTTTGCCTCAAAGATTACTTCAAAGACTTTTCAACTTTAAGAAG  
GACAGAGATGGTACTGGAAGTGGTTTGCTGGTAACTTGGCATCTGGAGGAGCAGCTGGTGCCTC  
TTCCCTTCTGTTTGTGTA CTCCCTTGACTATGCCCCGTACCCGTCTAGCTAATGATGCCAAGGCTG  
CAAAGAAAGGAGGTGGTGAAGACAGTTTGATGGTCTTGTGATGTCTACAGAAAGACACTTAAG  
ACTGATGGTATTGCTGGTCTGTACCGTGGATTCAACATCTCATGTGTTGGTATCATTGTCTACCG  
TGGTCTGACTTTGGACTCTATGACTCTGTGAAGCCTGTTCTCCTCACTGGTGACTTACAGGTAT  
GTCTTGTGCTTTTCATTTATATCTGTAAGGTGACAGCTTAA

B.

```
FIVE      TATTAGAGTGIGGGCTTCCAACCTAA 26
THREE    TATAICTGTAAGG--TGACAGCTTAA 24
***.: :*:.* * .**.* **
```

C.

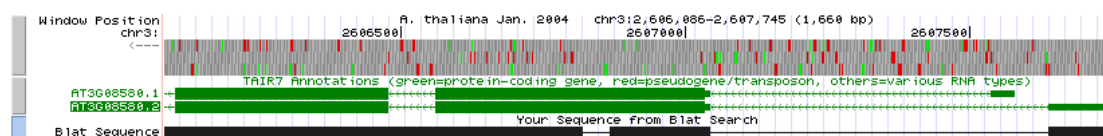

D.

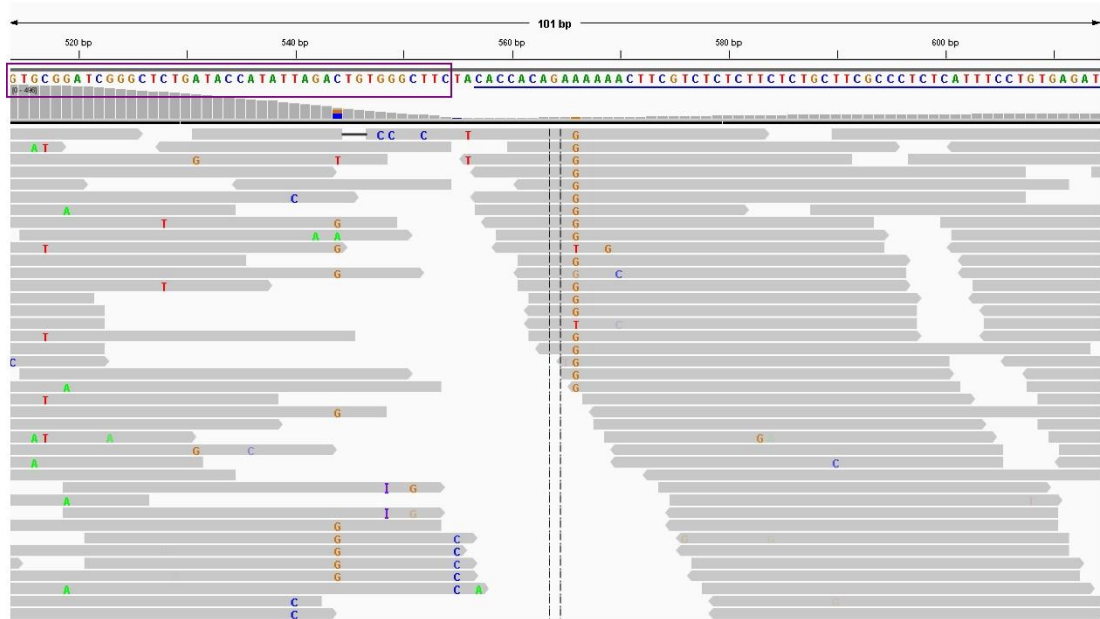

E.

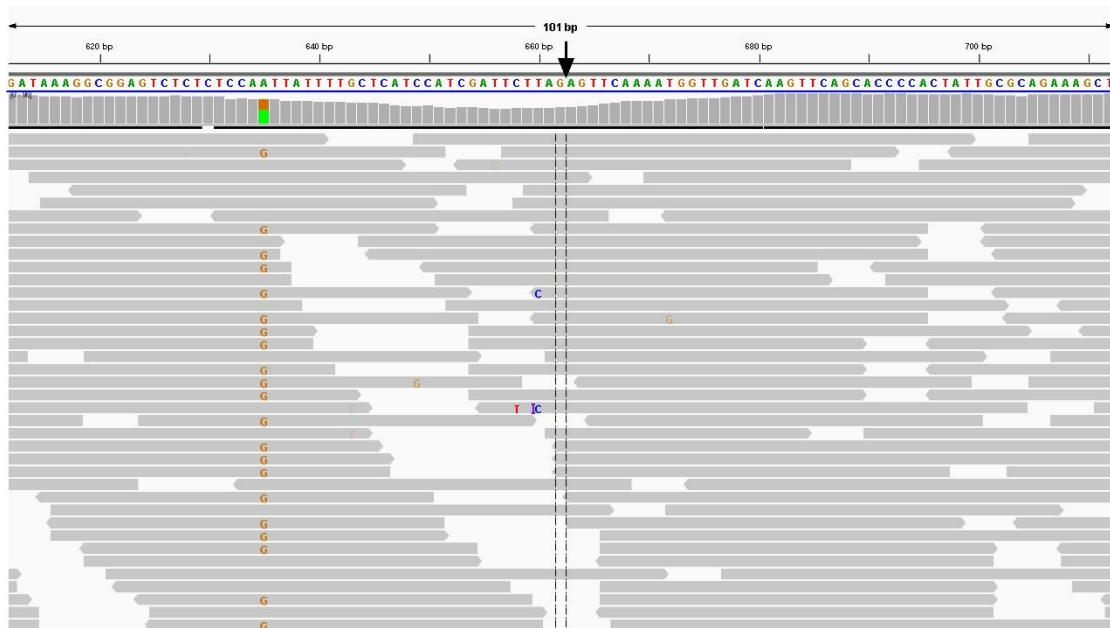

F.

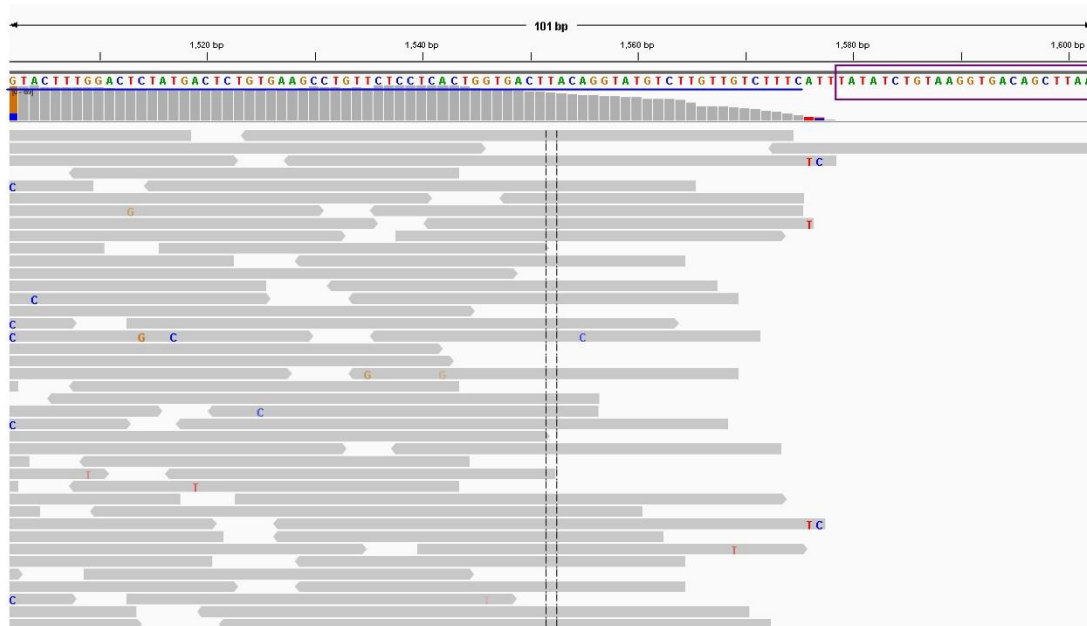

**Figure S2.** Schematic representation of the retroCNV “RC\_AT3G08580.2”.

Panel A shows the architecture of the whole retroposed locus with the retroCNV underlined, the exon-exon junction of the parental gene in bold (“GA”), 5’ and 3’ flanking LTR retrotransposon sequences in purple and the preexisting sequence in the insertion site in yellow, respectively. All other nucleotides (*e.g.*, 3’ flanking “ATT”) possibly represent secondary mutations or mutations generated during the template switch from the LTR retrotransposon to the mRNA. Panel B shows the alignment of the 5’ end of the LTR (labeled “FIVE”) and the 3’ flanking sequence in panel A (labeled “THREE”). Such a decent alignment (Identity = 53.8%) indicates that the 3’ flanking sequence is also derived from the same retrotransposon. Panel C shows a Genome Browser view ([epigenomics.mcdb.ucla.edu](http://epigenomics.mcdb.ucla.edu)) in which the retroCNV was aligned to the parental gene via BLAT<sup>7</sup>. The green boxes mark the exons of the parental gene, whereas the thin arrowed lines mark the introns. The retroCNV was represented as black boxes, with the first short line indicating a possible secondary deletion and the second long line indicating the lost intron. Interestingly, a small intron encoded by the parental gene is inherited by the retroCNV. Panels D, E and F show the snapshots in the IGV genome browser<sup>22,23</sup> zooming onto the 5’ breaking point, a partial region of

retroCNV encoding one exon-exon junction and the 3' breaking point, separately. For each panel, only one 100 bp window is shown to enable a base-level view. The browser consists of the following four tracks: the axis, the consensus nucleotide with "A", "T", "G" and "C" color-coded, the depth curve and the reads aligned to the focal regions with single nucleotide polymorphism shown. The two black dashed lines mark the center of each view. In order to generate such a view, we prepared a customized SAM file by running BWA<sup>24</sup> and aligning reads onto the assembled contig in the accession "No-0", in which the contig was originally assembled. Since hundreds of reads could be aligned to the contig, the snapshot only shows a portion of them. Consistent with Panel A, the nucleotide track is decorated with the LTR retrotransposon marked in a purple box, the retroCNV underlined by the blue line and the exon-exon junction highlighted by a downward arrow. As shown in Panel E, numerous reads span the junction directly suggesting an intron-loss event.

**A.**

AAAGTAATTAATTAAGCGAAAATATATTATCTATTTAAAAATGTATCCAACAATTATCATAA  
 ATCTCAAAATTTATATGATAACATTCCTAAATTTCAAAGGTGTCTATCAATCTATAAAACCAT  
 GATTACTTTCTGAAACCTTCCAGAAATTTACTAAAAACATGTTGTTCTAGATACTTTTGAGTTT  
 TGACACAATGAGGACCATTCTATATCTTTTGTAAGATACTCTAGTAGTCTAGTCCTACTGTCTC  
 GATCTTCTATTAATCTTTAAGTATAGAAGATCCAAGTAACTTACATATAGTTAATAGAAGATC  
 CAAGTAAGATCAAAGCCAATAATATTAATTTATATAAAAAAAATTGTAACACTGTTTTTTTT  
 TTCAATTGATGAAAGGAAAAAGCATTGAGGAATTGTTTTATTTTTATTTTTTTGTTAACATTC  
 ATTTATTTAAATTGCATAAGAAAAGAAAAAGTGATAACCCATTGCCAGAAACAAAGGTATAGAGA  
 ATGTGGTAACCATTGATCTGCATGGTCAGCATGTTAAACCAGCAATGAAGCTACTGAAGCTACAT  
 CTGTTATTTGGATCATATGTTCCAGCCATTGAGACTCTACGAGTGATCACAGGATGTGGAGCTTC  
 TGGGTTTGGGAAGTCTAAGGTGAAACAATCAGTGGTAAAGCTGCTAGAAAGAGAAGGAGTTAGGT  
 ATTGTGAAGAGAACAGAGGGACTGCTGATCAAGCTTGACGGAGGTAGTAGAGAGTTCAGTTTC  
 TTAGACACAGAGAGTGACTCTGATGAATAAGTGATAACTAAAACCTAAAGTCAGTTTTAGCTTTA  
 GATCTTAAAATTTATGTCGATTTTGCCTATATCTGATGCTAGCTCTCTGTTGTTAAGTAAATGTT  
 GAGCAAAAAAAAAAGTTAAACAAGCCTTAGACAAAAAATTAAGAGCCCAATAACGAAAGTTG  
 AACTGTAAAGAAACGAAATATACTAGTTGTAGAATTGTATATATAGGATAGCTAGTAAAAAAGA  
 GTGGTTGTTCTGTAACATAATCATTATTTTTTTGTTGACATTCGTAATCATTGTAACATACGA  
 AATGGAATTTGAAAATAGTGACAGTAGCATACATGTTCTAAAGAACATTGGTAAAGTAAAAAAGA  
 GTGACTGAGTGTTGAGTAATTGGAACAGTAGCACACATGTTCTAGATATTTAATGTTATTTATAA  
 ACTTCACGATACAATAAAATTTAACATAATATATTTATAAACTTATATCGATACAATATAGTTAA  
 CACAAAATATTTATAAAATTTATTGATATATATTTGTTATCTTGTTAACACAATAAGTATCAGTT  
 AATTTATAATATATTACTTATATATTTGATAAACAATATCATTGTAATAAGATAAAAGATGT  
 CGATAACAATTTTCTTATGTTGTTAAATAATTTATTATGAGCGAAAAAGTATTTTTGTCCAACCT  
 ATAAAAATTGAAAATAATTATGCAAAAACCTATAAATATATTTTTAGTTTTATGTTTTTAGGTAT  
 ATAAATTAATATAGTCCAT

**B.**

```

FIVE      -GTGATAACCATTGC-- 14
THREE     GTTAAACAAGCCTTAGAC 17
          * * * * *
  
```

**C.**

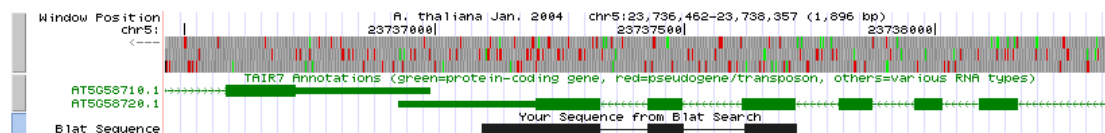



D.

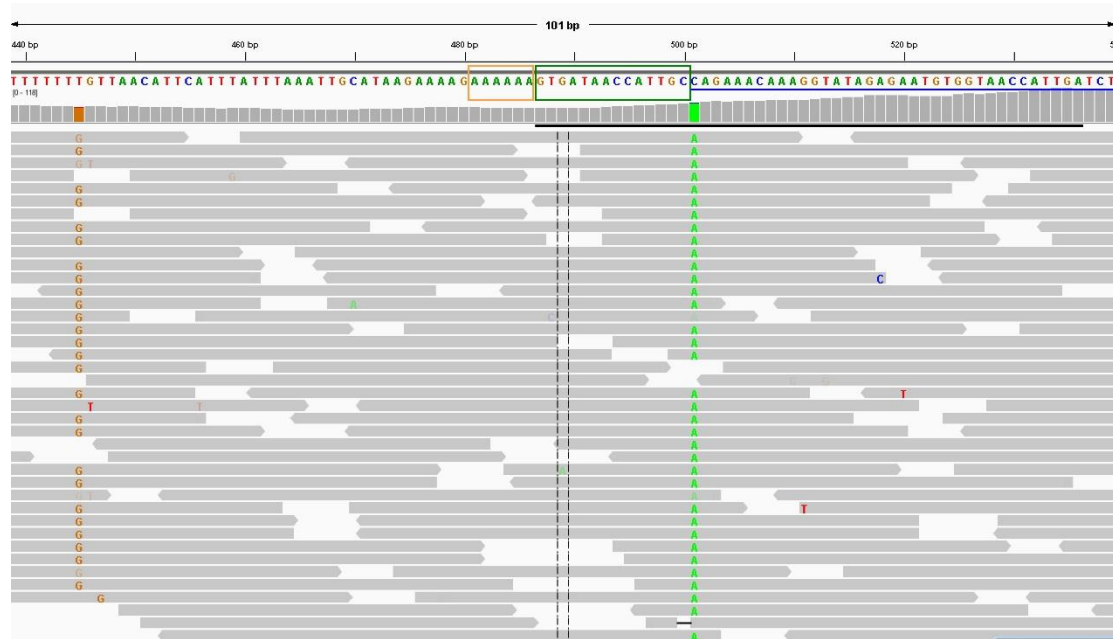

E.

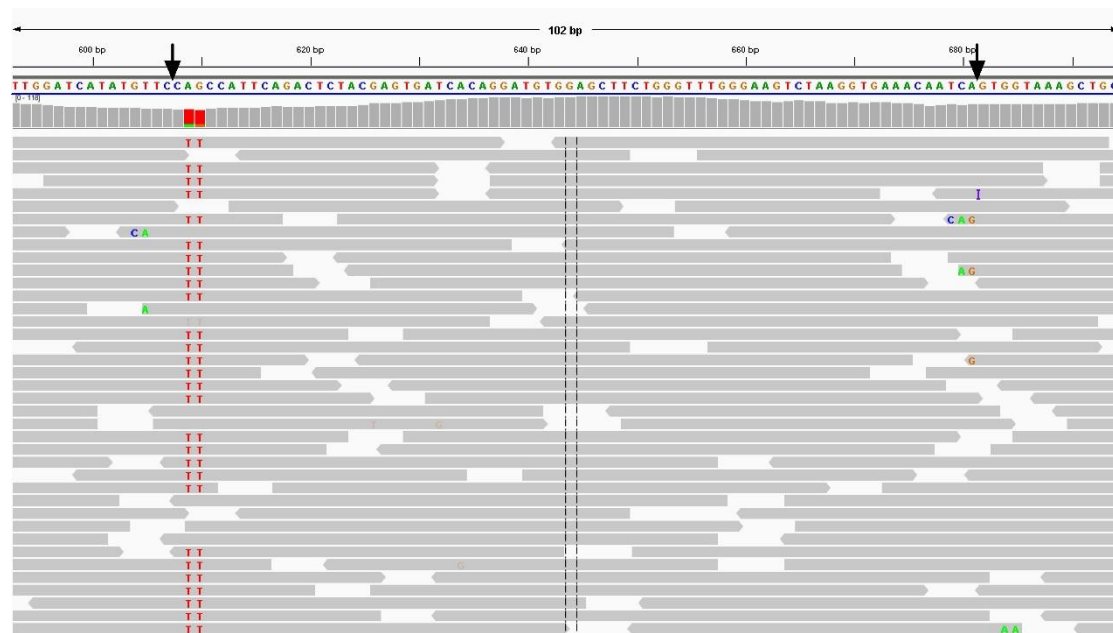

F.

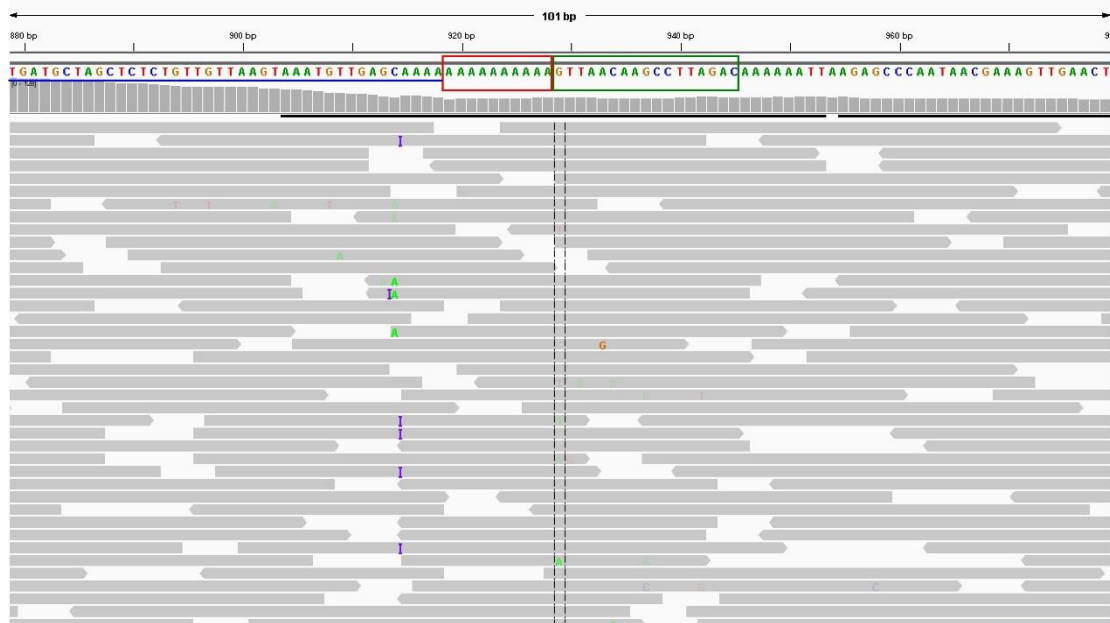

**Figure S3.** Schematic representation of the retroCNV “RC\_AT5G58720.1”.

The figure convention follows Fig. S2 except that in Panels A, D and F, the candidate target site, the target site duplication and the polyA tail are marked in orange, green and red, respectively. For Panels D, E and F, the short reads are from the accession “Oy-0” where the contig is originally assembled.

**A.**

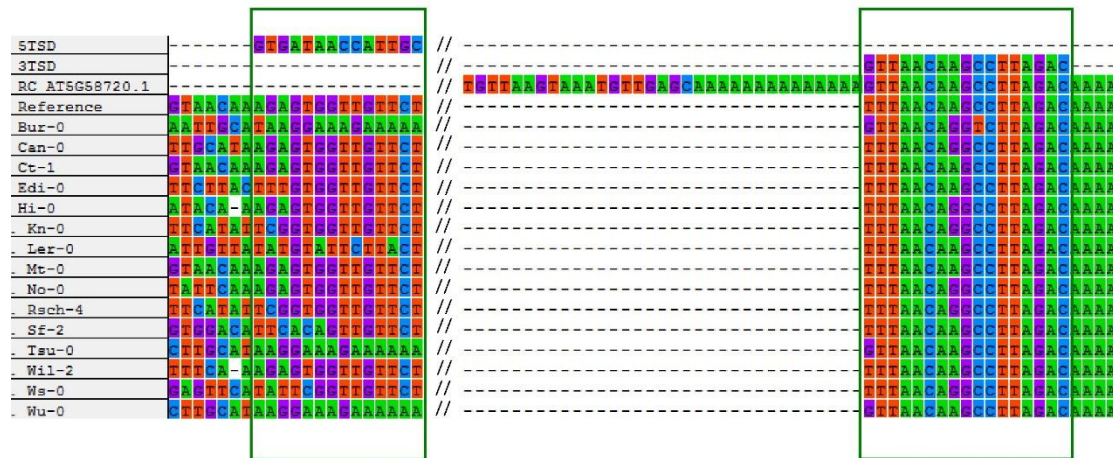

**B.**

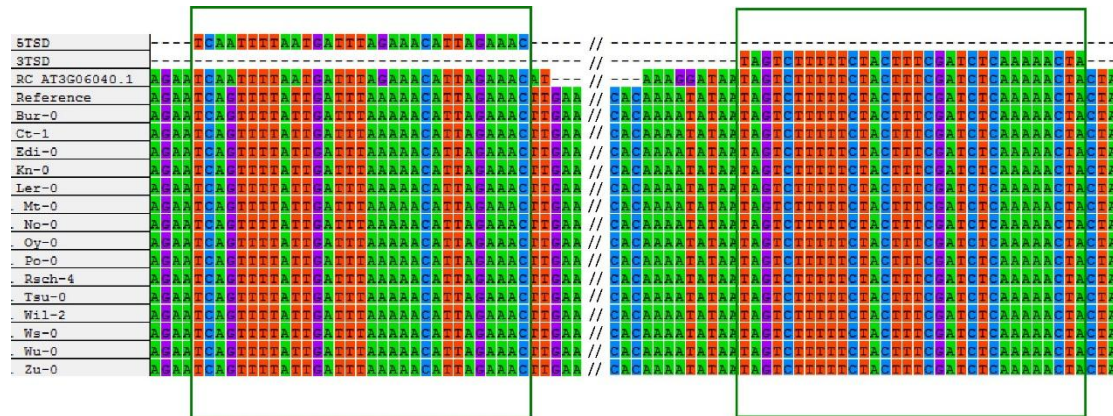

**Figure S4.** Multiple sequence alignment at the insertion site of the retroCNV RC\_AT5G58720.1 (A) and RC\_AT3G06040.1 (B), respectively. The snapshot is made by Mega<sup>25,26</sup> and the alignment is done using MUSCLE<sup>27</sup>. TSD is marked in a green frame. In A, the third sequence is the assembled retroCNV and its 3' flanking region. The last 16 sequences show the empty site in the accessions without "RC\_AT5G58720.1". "//" denotes the skipped retroCNV sequence. The left side is poorly aligned compared to the right side suggesting the absence of 5' TSD. Panel B is similarly plotted as Panel A. Compared to Panel A (RC\_AT5G58720.1), the empty site of RC\_AT3G06040.1 clearly encodes 5' TSD, polyA tail and 3' TSD. "//" denotes the 6 kb insertion across the reference genome and 16 accessions.

A.

TCCGTTATCTCCGCCGAACCATCCATCCTCCGCTACTTCATCTCCGCCGCTGAGATCGGAATCAC  
TATCCACTCCATTTGATTTTGCATACACACCCACAAAATAAAGCTTAAGACTGCCACGAATCT  
TCTTCTCAGCGACAGGAGAAGAGACCCAGAAGAACACAGTTTGATTTTGAATCGCGAATCTGA  
TATCTGTAGGTAATCGAAGTCTCCACAGGAAAAAGTTCAAACTTTAGACAAACCCAGAAATCGT  
CTTCTTCAAGAACAGGAGACAGAAGAACAGATTTTAAAATGGAATCAAGCGAAGGAAAGAGGAAT  
CTGATATTTGTAGGTAATGGAAGTCTCCACCGCCCACTTCTAAGAGGAGGAGAAGAAGAAGAGAG  
ATGATTCGGTCGCTCGATGACTCGGCTCTTCTCAGTGCCTCTCCTTTTCCATCTTTAACCAGACC  
GGTTTCTTAATTTTACCTTACCGTTTAGTTTATTTATCCGGTTTACACAAAATATCCTGTAAGT  
TCCTTGTGAGATTTTTTTGGTTTTACCAAATGAGTGATTTAGAATCAATTTTAAATGATTTAGAAA  
CATTAGAAACATCGTGACTCAGCTCCGTCTCTCACTGTAATAATCAAGTCAGAGCCGACGAAGTT  
GACGTTTGCGCCGTCGGAGGAGAGTTTTACTGTTGCTGTCCAGTTGACATTTTGAGACATGAAA  
TGATCTGGGTTGATGTTTGTATGGTAACAGAGGAATTATAGTCATGAAGCTTATTTCACTTGTC  
AGAAACGTTTCGTTCTCGCCAATGTCAACCGGAAGTTATCTGGTCTTTGCAAGTTCGTTTCTTGCA  
GCAAGATTCTGTCTCGAAAGCTAAACCCAAGAAATACAAACACCCGTCAGTTTATGATCCGTATG  
GTCCTAGACCCAGCCTTCAAGCAAATCATGGAGCTAGCTGAGCGTATAGCTGCATTATCTCCA  
GAAGAAAGAAAACAGATTGGTCCTGCTCTCAATGAACACCTGAGGCTTCCAAAACAACAGATGAT  
TTCATCGGACGGCATTGGAGCAAACAAGATACGGAGCTGGGAATGTAGAGGAGAAGAAGGAGAAG  
ACGGCTTTCGATGTGAAGTTGGAGAAGTTAATGCATCTGATAAGATCAAAGTGATAAAAAGAAGT  
TAGAACGTTACAAGTTTGGGTCTGAAGGAAGCGAAAGAGCTTGTGGAGAAAAGATAAATAGTCTT  
TTTCTACTTTCGATCTCAAAAACACTAAAAAGTGAAGCCTTGTAATCTTCTTTAAAGAGTAGA  
AACATGTATTATTATCTTTTAGTTATTCATCTTCAAAGTTTGGATTAATTTAAAGTGAATGAAAT  
ATAAATTCAATACAAAAAAGAAGAAACCCAAATCTACAAAAGAAAAAAGAAAAATATATAATT  
GATTTAGGATTCTAAATTCTCACGTA CTGGAGAGCAAGCCGTTGAATAGACTGATCATCGAAGC  
AAGGATCAAAGGTCTTAATCTTGGACACAAAATCCATAGCTTCACTATACTTCCCTGCTCTGCAA  
TAACCATCTACTACATTTTAAAAGTCAAGCTCATTTGGTCTGCAATCATTCTTCGCCATGCACTC  
AATCACATCTTCTATCTCTGCAAACATTCCCATCGCCGTGTAACCCGAAACAACGTGTTGTAAG  
TGAAAATGCACGGTCTGATCCCCGCTCTGTCTCTCAGACAGCATCCTAACCGCTTCTTGATC  
AACCTCTTCTGCAGAAACCTTTGATCACTGTGTTGTAAGAGACCAGGTCCGGTTTTAACTGCGA  
TTTTTCTAGAGTCTTGAGGATTTCTTCGGCTTCCAACACTCTCCTCTTCTTACGTACATGTCCA  
TCAGGCTGTTGTAGGTTACAAGATCCGGGCTTAGCCCATCCTCGCGGATAGACTCGAGAATCCCC  
TCTGCTTGATCGTACATGTTGTTCTCTCGTAAAAATGGAGAGCATTGAGTTGAAAATCACCATGTC  
GGGTTTGTATCCGTGCTTTTTAAACAATGTGAATGCTCTCTCTGATCCTGCTAGTGCTCGGCATT  
TAAAGTTTGCAGGAGTAATGTTCTCAAAGCATCCAGCTCGGAATATTTGGCCCTCCTTTATC  
CCATTCTCGATTCTCTATCCCTAGATAGTTCCCTCCTTTAGCATAACACTGAAGCATCAAGGA  
ATAAGATGTTTCAAGTGGTTGAAACCTTTACTTTTCATGTCCGAAATCACATTTTTCGCCTGATC  
TCCAATCTCCTTTTCTTGCCAAGGCATTAAGTAACCGTGTGTAAGTCGTAACGCAAGCGTTGAAC  
CCTGCTCTTGTCTCACCATACATTTTTCGATGCATCAACCTCTGAACCACATCGCCCATAGGC  
ACTGATCAGCGTGTGAAATGTCCCTATCAGGTTCAAATCCGCAGCTCTTCATTTACGGAACA  
CCCGTTACAAACTTATCCATACCCTTATCCACACAGAGCAAGCATTGTGTTCCAAGTGGCA  
CGATTAGGGG

B.

```
FIVE      TGAGTGTATTAGATCAATTTTAAATGATTAGAAACATTAGAAACAT 46
THREE     T-AGTCTTTT---TCTACTTT--CGAICTCAAAAACACTACTAAAAAG 40
          * ** *:* **  **:* **  ** *..**.*.: **.*
```

C.

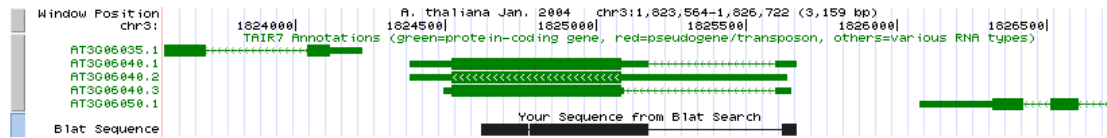

D.

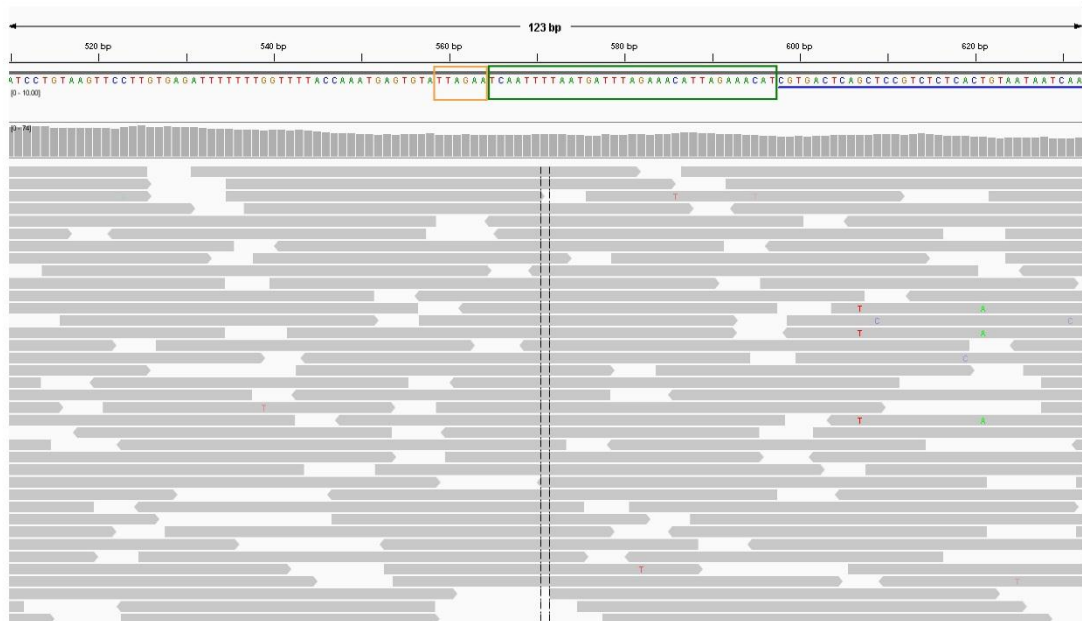

E.

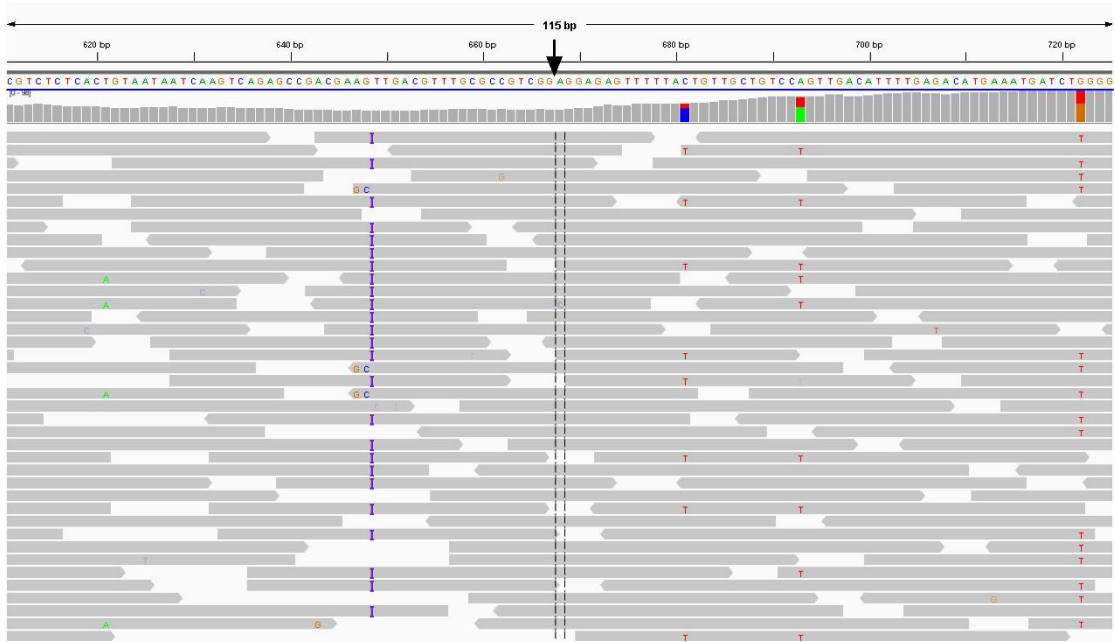

**F.**

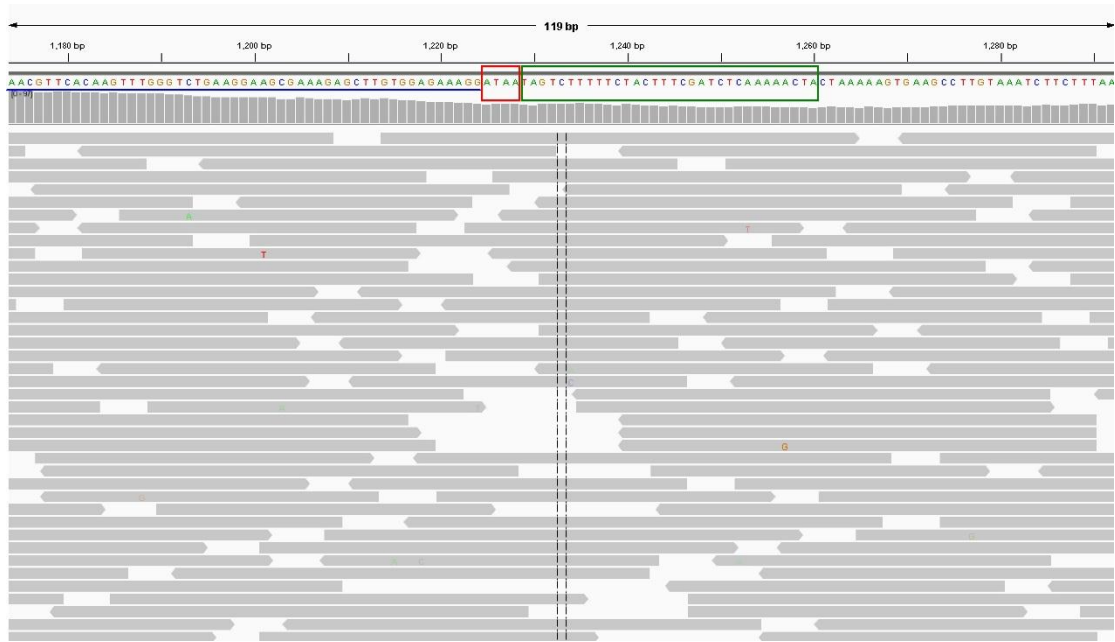

**Figure S5.** Schematic representation of the retroCNV “RC\_AT3G06040.1”.

The figure convention follows Fig. S3. The short reads in Panels D, E and F are from the accession “Can-0”.

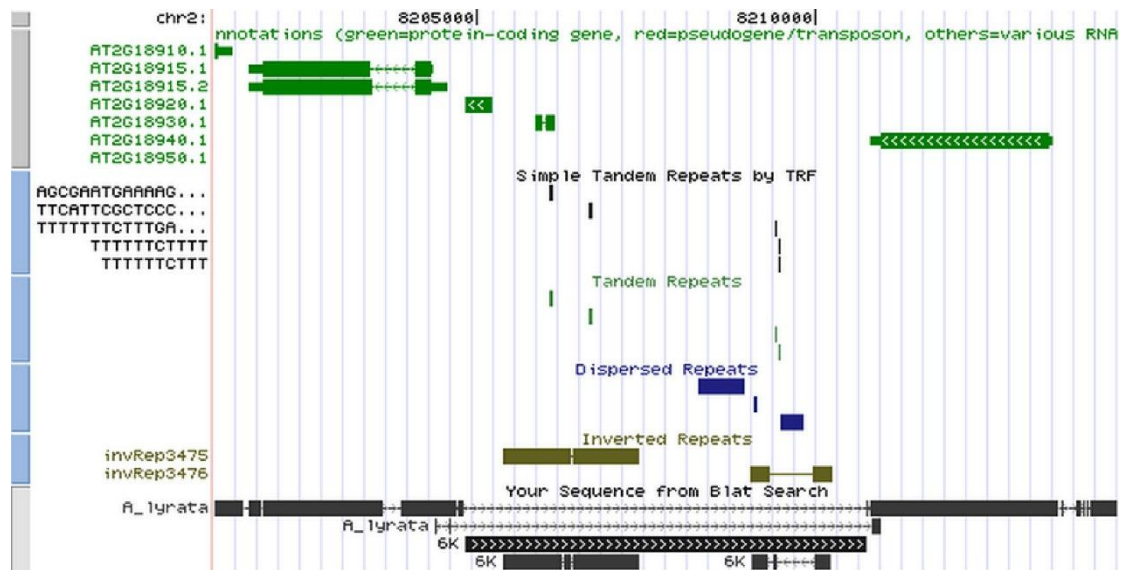

**Figure S6.** Genome Browser view (<http://epigenomics.mcdb.ucla.edu>) of the alignment of *Arabidopsis thaliana* and *Arabidopsis lyrata* in a 13 kb region around the insertion site of RC\_AT3G06040.1. The following tracks are shown including gene annotation, various repeats and user-supplied sequences aligned to this region. Sequences tagged by “A\_lyrata” refer to the orthologous genome sequence of *Arabidopsis lyrata* identified via BLAT<sup>7</sup> search using the sequence flanking the insertion site of the retroCNV at the reference genome, while ‘6K’ is the insertion between two “TSDs” of “RC\_AT3G06040.1” in the reference genome. Clearly, this insertion is absent in the *Arabidopsis lyrata* genome.

A.

```
TTAACACAACAAAAAAGGTTGTTGCATGGAAGATTTTTACCGTTGTTTGTCTTGAAGTGAAAT
TTTAATGTCTGGCTCCACTTTTTTGTGTCAATTTTCTTCTAAGAATAAAACAAAAAGGAAAAGGA
GAAGCAATTGCATTGAAGTGGTGAACAAAATTAATTTCTCAACATCAAAGTTGATGACTTCATAC
ATATAATTTACACCTAAGAGACTAATTTGACACTGTTAGCAAAAATAAAAAATCAAACCTTCATC
ATGGGTCAACTCTTAATTAATAATCTATCTAGATATTTATATGTAGTGTTGTTGTTTTAAGAACT
AAAACATAATATCAAGAAAAGAAATAAGTTTGAAACGGAGCCGAGAAAAAACAGGTTTACAGT
TTGATATAACACCGTATCGATGGGGTGTGAAGTATAATGTTTTGATAATTACCAATCATAAAAGC
ATTATTAATAATCGATATTTTCGGCTTAATTTGTGCTTGGGGCCAGGAACCTTGGCAAATTAATG
AGCTATTCTAAGAGTTTGAGACCTTACCACCACTACTTTGTAACGTTTTTAATACTATTTTTTATCG
TTTGCCGCTAAACAGTTTATATCGTTTTTGTGTTATCCGTCAGACCCTAAAAACTAAAATGGAAA
AATACAAGTTAACTTGTACATTACGTATGAGGAAGAGACATTATAATTTGAGCAAAAAATATGAC
AGTTTTAGGGGCACGATGCTAGAGGAAAGAGATTCAAGTAAAGGTATGTCAATTTAGGTTTAAAA
TGAGATTTGGTATAATAATTTTCTTAATTGTTTTGACACTACAAGAAATATCCACATTCTTAGCA
AGTTAGAAGCGCTGATTTGTTTATCCACATTATTTATAATAGTTTGATTTGCTATAATAATTTT
CTTAATAATTTGAAAAAAAATGTTATCACATAGAACTGTAATCACTATAAATAAAAAATCATGA
TCCTTTTTATCCTATCATTAGTTATAGAAATTAAGTTCTTAGATTCTTAAAAAAGCATAGTAT
TAGAATAA
```

B.

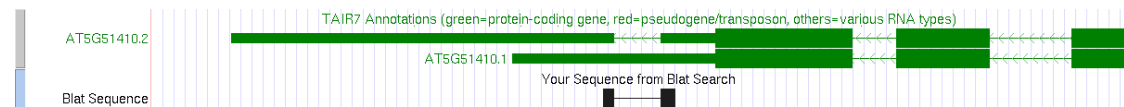

C.

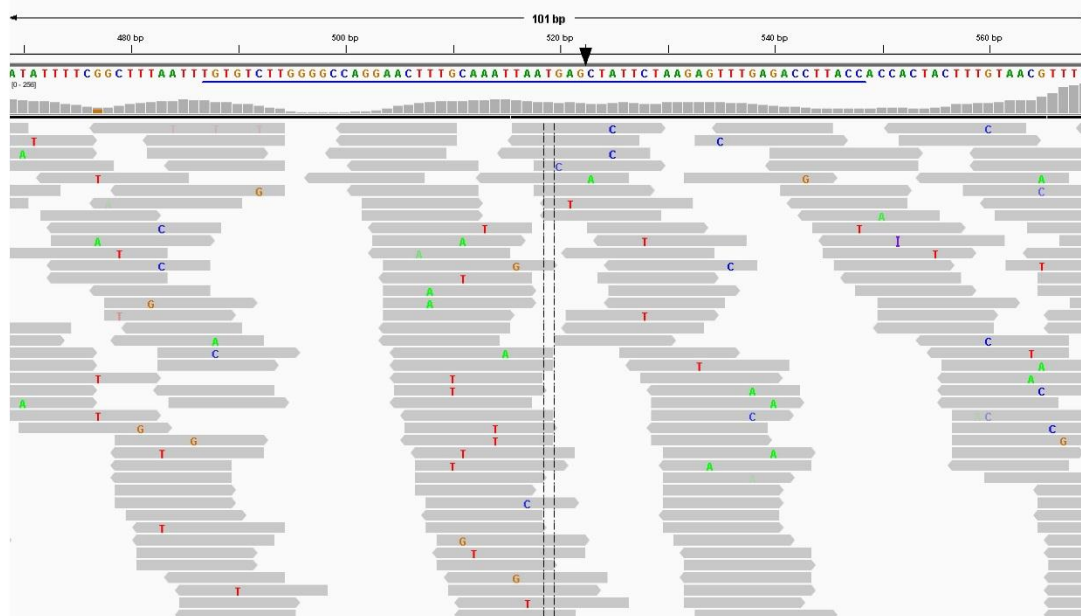



**D.**

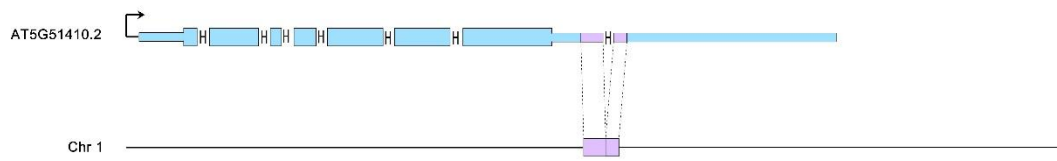

**Figure S7.** Schematic representation of the retroCNV “RC\_AT5G51410.2”.

The conventions of Panels A, B and C follow Fig. S3. Panel D follows Fig. 1. The short reads in C are from the accession “No-0”.

**A.**

ATAATTTTGCTTAAACATATTTTTGTTTTGCTTATTTGATGGACATAAATGTACAACATCCTAT  
TGGATTTGAATCTCATGGAGATATTGCAACCCCTTCTCATGGTGCTGGGATTTAGCGGGACTGA  
AAGGAATATCTTTTTACGTACGTTTAAAGAGGTATGGAACCTGGAACTTTGATTGGAAGGAGTTTG  
TTAATCCCTTATACATGAAGACCTATGACGAGATAAATAAGTATGGAATATTACTTTTTGAAACAC  
ATTGCCGAAAACCCTAACGATAATCCTAAAACCTTTTAAAGATGGAGTTCCCAAAGAAGGGATAAG  
AAGTGACGAGCTACTAGTGAGCATGACTTTTTATGATGCTAGTAAAGGAGAAGTGTCAATTTTTGG  
ACAACAATCCGACCAAACCTGTTTTCTCTGACTACTTTATCAGAAAGTACAATTTGAGAAGTGAA  
GCATTTTCTAAGGAAGAACATGATAGGATGCTGATTCTTGCTGTTTTCCAAGCATGGCTATGGGAG  
ATGGGTGGCCATCGTTGAAGACGAAGAGTACAAAGGGCCTTGGCTATCACATCAGATTAGAGGTG  
CTCGGTTACGAAGATCCTTAAACAAGAAAACCAAACGGATCAAATTCAACAGAGCAGAGATTATTA  
GTGGTAAATTGACGAACAAAAATTAGATTTTTTAGAATTTGAGGACAAATAAGAACATTATTGAG  
GTGAAGGGGACGAGAAGTACTAGATGGAATTGTTGTTTGACCATAAGAAGTGACAGGAATTGTGGAAC  
CGTTACCGACAGTGACGAGAGGAAGAGAAGAATTAGAGGATGAGGTGATGGAAGAGAGTGTACCT  
GGCTGAGCCATGAGGTGAGCTGTAGCTGCGGAGTCCATGTACCATCCAACATCATTAGGATCCGA  
GAAAGTCATCGTGTGAATGCATTTGCGAGCGTAGTGGGAATTATGTCTGTGTTTGCTGGAGAGG  
TGATTGTTGGGCCGAGGTGAGGAAGGCAGACCCGTTTATGAGGAGTGCCTGACCGAGAATCCCT  
TGTGCGGTTGTGGCAGCGTTGGTGGTTGAGAGCCAATGTGAAATCTTGGTTGCCATAGAATTG  
TGGAGGAGGTGGTGTAGTGGCCAAATTGGCATATTGGGCCATTGTGGATAACTTGGCCATTGAG  
GTTGGTTGGGCCAAGTTGATGTTTGATTTCCAGAGCTCCAATTACCGCCGTTGTAGTTAGGGTTG  
CCGCCACCACCACGACCTCTGTTTCCTCGACCTCCTCCGCGATTGTTTCGATTGTTTCGTCCTCC  
GCCACGACCGTACTGGAATTGTTGGTTGTGAGGACTGAGCGATAGTCTTGTGTTGAGAAGAGG  
CAAGAAGAACATGTGGTGAAGAAGCGTTGTATCATTGTTAGGAAGAGATTGCAGCTTGGTTTTA  
AGCCTCGATTCTTCTTCAATGAGCATCGATCTGGCATCGCCAAAAGAGCAAGGTGGGGAACGATG  
TTTTAATAACATTAATGATGTTATCAAATTTGGAGCTAAGTCCATTGAGAAGGTGCATCACTAAGG  
CGCGATCTGAGACAGGGGAATCCACATTGGCGAGCGTATCAGAGAGTGACTTCAGTTTTTGACAA  
TAGTCATGAACGGATTGATCGCCAATCCAGAGATTTCCGAGTTCATTTTTAGTTGTATTGCAGG  
GGCTTCTTTGTTGTGAGGAATAAATCTCGAGCATGAGCCAAAGTTCGCGTGCAGAGCACTGCG  
ATTTTAAGACAGAGTTGAGGAGCGATTCTGAAATGGTACCGTAGATCCACATCTTAACCGTATTG  
TCAAGTTGCTTCCATGTTGCGTCCGTTGGTCCGATGGGAAGGGAGGTGCCATCGATATGCCCGGT  
GAGAGAGAACTAAGGCAATGAGTTTCAAGAGGATGCGCCATGAATCGTAGTTCATCTTCTCCA  
TGTTGAGAGTGATGGGGATGTGAGCACGGATCTGAGTGAGACTCGCAGCAGGAGTAGTAGCGGTT  
GGTGGAGGAAGTGTGCCATGAATTAAGTGCAGATCAAGAGAGACAAAGAAAAAAAAAATTGGAGA  
GAAGAGCTAGAGATACAGAGAGAAAAGTGAAGCGAAGAGCAAAGAGAGAGAGAGAACACGAAGA  
AGAAGACTGAAAAGATGAGGAAAAGATGACTGCTAGAGTTTAGAGAAGAGTCTCTGATACCATAT  
TAGAATAGGTATAATCTCAATTGATGAGTTCCTTGACATATTCACAAAGGGTTTTAATACATAGC  
AATATACAAAGTAGCCGTTAGAGGCTTAATGAGAAGATTCCTAAAATACAGAAAGGAATATATGC  
ATTCCTATTCTAATAATACTTTCCAAGAGGTTGCCTGCAAAGACCTGAATATCCATTTCCCTTC  
TGATACTGAGTCTGCTCATAAAAAGAAATTCGTGATCATGTGGAAAACCGGGTTAAGAAGATGGAAG  
ATGCGATAAAGTATGAGTACGCAGAAAAGATACGTGCTGAACAAGTATAAGCTGAAACAAAGGGA  
ACGAGCTTTGTTGATGCAGACAAAGAAATGCTTGATAGACTGCCTAAGAATGATCCCATCACTTC  
AGAAGAAATTTCTGAAGCTGCTGTTGACAACAAGCAAAGTAGAGTTATTATAGACATATTTAGAT  
ATTCACCATACGATCAGAGTGTAAATAAGAAGTATTATAGACATATTTAGATATTCACCCT

GATTCGAATGCCGAGGAAGAACTTTAGGCCTCTGAAACCTATCAGTAAGGAAATAAACACTAGGC  
 TAAGCGCCGCAACAGATCATGATGTGGAGATAGATGTAGCGGATAACATCATTGTGTTGAATTGA  
 CATCAAATCATTACTTCTTTTATTACAGTTTTATCTTTGGCTGATTTTATTTACTAAGATA  
 CCTTCGCTGAATACTTTTTTTTGTCAAATTATAATACTAAGTTACCTTTTACTAAAAAAG  
 GAAAAAAAAAAACGATATTGCAGCCCTCGTGCCGCTTATGTACTGTAGCCGTACGTTTTTGTG  
 AAGTTCGATTCTTACACTTAACAGAATC

**B.**

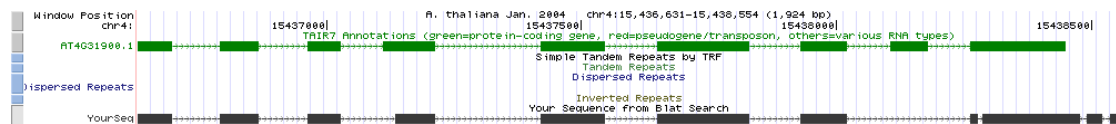

**Figure S8.** Schematic representation of the retrocopy “R\_AT4G31900.1” (“R” is short for recently evolved retrocopy) encoded by the Arabidopsis reference genome.

The figure convention follows Fig. S3 except that 1) in panel A, an insertion is marked in dark blue which can be aligned to LTR element *Copia-82\_ALY-1* on Repbase<sup>9,10</sup> with the BLAST *E* of  $5 \times 10^{-49}$ ; and 2) in panel B, the retrocopy was encoded by the reference genome itself, and it was further aligned to the parental gene, *i.e.*, AT4G31900.1.

CAGACGCGGACGGGACTACGAGTCTGTATCCAGGAAGCGTGCGAAGAAGACGACGAGTGCTAGT  
ACAGATCTTAAGTTGGTTTCTATAGACTACTTGCGGATTTCAAATCTTTTAAAATATATTTTCT  
TATTTTAGTATTGCTTTTAACTCTTGTTGACTTATGTCTATGCGACTTTTTCTTGCTTGAAAGC  
ATGCGGTCTTTGTTTTATGCATCAAATTCGCCTGTCCCCATTAGCATTTTTTTCTCCAAAAGG  
ACCAGCACTTATGAAACATATGTAGTTTTTGGAGAAGACTTCAAGAAGTGGTTTGTGTTCAATC  
AAATCAAATATTTCCAATTCTAGAAGTCTAAGAGTTACTTTTTATAAAAAGGAAGAAACATGAA  
GACGAACAAAAATTTCTATTCCAATAGCCTCAACCTATTAAGTTTAAAATAGGTGCTAAGGCT  
AGAGAAAAATTTAGTTGAGTGAAACTGTAAAGTGCAGTGGGTTCCCTACTTCGTCCAGCGAGA  
AAGGAAGAGGGTTTTCGTCTGATTCCGCTAAATCTCTATCTTTATTTAAAGATGATGGATTCCGA  
TGATGATATGCTCGATGCCACGATATGGACTCGGTAGATTATGATTTTGACAGCGGCGGCACCG  
ATGATGACAACGATATTGATGAACTGATTACGTGTTTGGTGAGGCTGACACGGACGATGCCGCC  
ATCATCGCCTACCATCGCTCTCAGATAAATTATGTTGTTCTCAAGGAAGAAGATATTCGCAGGCA  
TCAGAAGGATGACGTTGGGCGAGTTTCCGTTGTCCTCTCATAACCGATGTCCAAGCAAGTCTTT  
TGCTTCTTCACTATCACTGGAGTGTGAGTAAAGTTAATGATGAATGGTTTGGGATGAGGACAGA  
GTTTCGTAGAACTGTTGGCATATTAGAGGGACCTGCACCTGATGGCAGAGAGTTTACATGTGGAAT  
ATGCTTTGAATCCTACCCTCTTGAGGAACTATATCGGTTTCTTGTTGGTCACCCATTCTGCGCTA  
CATGTTGGACGGTTATATAAGCACAAAGCATCAATGATGGCCAGGATGTTTGATGCTAAAATGT  
CCCTACCCTTGTTGTCCTGCGGCCATTGGTCGAGATATGATCGATAACTTGTGTTCCAAGGAAGA  
CAAGTAGAGGTATTATAGATATTTCTTAGGTCTTATGTTGAAGTCAACAGAGAGATGAAGTGCT  
GTCTGCCCCAGGATGTGAGCATGCAATTAGTTTTGCTGCTGGGACCGAAAAGTAATTATGATGTT  
TCGTGCTTGTTGTCATAGCTTTTGTGGAATTCAGTGAAGAGGCTCACCGTCTGTGGATTG  
TGACACAGTTGGAAAATGGATACTAAAGAACAGCACTGAATCTGAAAATATGAATTGGATACTTG  
CCAATTCGAAGCCTTGCCAAAAGTGAAGAGGCCAATAGAAAAGAATCATGGATGTATGCACATG  
ACATGCACACCACCTTGTAAGTTTGTGTTTGGCTCTGCCTAACGCATGGACAGAACACGG  
GGAAAGTAGTGGTGGTATTATGCCTGCAACCGGTATGAGGCGGCTAAGAAACAAGGGTTGTATG  
ATGAGGCTGAAAGGAGGCGAGAGATGGCAAAAACCTCGCTAGAGAAATACACTCATTACTATAAA  
CGATGGGCAAGCAATCAAGTGTGAGGCAAAAAGCTATGGGGATCTGCAGAAAATGCAATCAGA  
GAAGCTTAGGAAGCTTAGTGACATACAGTGCACATCAGAATCTCAGCTCAAGTTTATCGCAGAGG  
CTTGGCTCCAGATCATTGAATGCAGACGGTACTCAAATGGACATATGCATATGGATACTATGTA  
CCAGATGATCATACTAAGAAACAATTTTTTGTGATTTTGAAGGGGAGGCTGAGTCAGGTTTGA  
GAGGCTCCACGAATGCATAGAGAATGATATTGAGGTGTTTGAATTTGGTGAGGGCCCTTCAGAGG  
AATTCATCATTTCCGGACAAAATTAAGTATTTAACCAGCATAACAAAACCTTCTTCCAAAAT  
CTGGTCAAAGCTCTGGAGAATGGTCTTGCTGACGTGGATTACATGCTGCTAGCAGCAAACCAGC  
AAACTGTAAACCTTCTAGCAATACAAAAGACGGTGGGAAAGGTAAAAGGAAGCTCTAACGATGG  
CGGTTTCAGCAGAAACCTAGATGGCAATTGAGATCAGCAAATTGGAGAAAAGTTTGGAGTTTAGA  
ATACTTTTGTGACTACTCCTGAGAGTTTGAAGGCTATTAAGTATACTCCTGTGAAGTTTCTTAT  
CTGAAAAAAAGAATACTAATTATGTTTACAACAATTTCTTTATTTCTTTCAAATTTTTGCAT  
TGTAACACTTTATTTTACAGTCAAAGTTTTATGAAGTTCTATGATCTTTCTCAATGTAGACAAAG  
CAATGACAGCTTCTGAGAAATAACATTGCCGTAATATATAATGCAAACGTTTATTGTAATAGTAA  
AGCTCATAAGCAGAGGCAAAACAATCTGTGATCATTTAACATATCCCACTACTAATTTAGTAG  
GTAATAGTTTCAAGTAAAGTGTCTTTAAAAGGATTCTAACGTGTCTCTCAAGCAGCCAACTC  
TTGGAGGCAATCTCAAAGACATTCTCAGACAGCCCATTAGCAGACATTATCATTTCCAATTGTGC  
CTGCAACACAACACACAACACAGCTTAATCTAATGATTACGAATCATGGCTACAGATTCC  
GATCTGCGGAAATATTGAACACAGAGGCTCAATGAAGCAAAGAACCAGGA

**Figure S9.** Schematic representation of the retrocopy “R\_AT1G05890.1” encoded by the Arabidopsis reference genome.

The figure convention follows Fig. S3A.

TTCAAAGGTGATGGGTTTTTCAGAGGAAACGTCATCTTCATCATCCGAAGAAGAGTTTCGTGCGAT  
 TTCTTTACCTTCTTCGTGCGTTGAAGAAGCACTCGGCGGATCTTCTAACGGATTGAAACGTCTCG  
 ACATTGTTTTAGGGTTTATGGGACTTTGGAGAGACTTAAGAGGTTGAAATTGAGATTTTTGCTTT  
 GCTGCCTTCACCACTTCGTTCTTAGGGTTTATATATATTGAACAAAGTGTCTCTCTGTTTTCCAA  
 AAATAAATAATCAAAAAATTATTGGAAAACGTATAAAATTATTTATTGTTTTTCTCTTTTTTTG  
 CATGACGTTTAGATTTCCGATTTCCCTTCTTAAAAATTTGGAAATTAGCTATATTGACCAATTTT  
 ATTTCCCTATATTTTATCTCTTACAAATAAATGTTAGATCTCTCTTTTACAACAACACCCGAAT  
 ATGACCGCTCATTCAATCGTCGCACACGTTGATAGCGTCCTTCCCAAGAAATCTCGTGAGATCGA  
CCGTCGCCGCCGACAGCGGAAGCGGAAGAAGAACAAGCATCTCAGGCCGATGTAGATGCAA  
TGGACGTGTCAAATCTCTGTCAAGCACTCTACTGGTATTGAGACACCGGATGCAATTGAACTT  
CGTAAGGAACAGAGAAAGGAACCTGATAGGGCTCTATACCAGGACTTGAAGAAAAGGGAGAGAG  
TGTTGTTGCTCCTGGAACATTGCTGAGAACTACACACACATACGTTATTAAGACTGGTACTCAGG  
ACAAGACGGGAACCAAAAGGGTTGATTTGCTGAGAGGGCAAAGACAGATAGAGTGGATTTCACT  
TTACAGCCAGAAGAGCTGGATGCTATGGGAAATGTTTTACAGTATGAGGAGGCAAGAGAAGAGGA  
GAAATAGCGCAATAAGCCAGTGGACTTGAGTGACATGGTCGTGAGCATGTGTAGCAGAATAGTA  
GGAAGAGGAAAATGCATGGCAAGGAAGAGAAGAAAAGAAAGATTTCAACTTCTGAGGTGCGTTA  
TGGAAGAGACAAAAAAGATTTTAGATTCTGGACATGAGACATAGAAAGAGATTCATGTTT  
CAGAATTATTAGTCTTGAGTAAGAGATCTTGAGTTTTTAGTCTTAATGCTTATT**AAAAAAAAAAAA**  
**AAAA**TGTTAGACCACCAATGATGTAAATTTTTAAATAGGTGATTGCATCATTGTGTAAACCTAAT  
 ATTTACATTTTGAAGGATTTGGTCTTTCTGCAGTATGTAAGTTAATTCAATCCCCTTATTATTCT  
 GACTTGTAAAGGGATTCAAACCCCATCAATGGTTTCTAACTTAAGTTTCTTATTTTAGAGAGAT  
 AAGTTTTATTATAAAAAAATGTGTGGGTTTTTTGATTAATGAAGAAACCATCTCCAAAATACTTT  
 ATATAAGAAATTTTGGAGAGAATTTCTAAATATTTAAGAAACCCACATAATTAATAATATTATT  
 TTTGTTGTTTTAATGTTAAGAACTTATATTTAGAAACCACCAATGAAATTCCTCTAAACATTAA  
 CATTGCATATAGTCATAAAAAAATATCTATTTTCTTTTTGGTTCTCTTTTTAATATAGCTTTCT  
 TGGTCAACACTTATTCTTAAATATCTTAGAAATT

**Figure S10.** Schematic representation of the retrocopy “R\_ AT4G21660.1” encoded by the Arabidopsis reference genome.

The figure convention follows Fig. S3A.

ATAATCAATGTTTTAAATTaAAACACTTATCTATCAATTTAATAtTATCAAAATTAATTTATTT  
TAAAACTATCTCAAAATATCTATTTTGTATTATATATGTTTTAAAATTAATAATTATTTA  
TTAAATTTAAATTAATTTAAATAATAAAATTAGTATTCACCTTTAAATTTTCAATATAATTTAT  
TATCTTATAACATAATAAATGTTTTATAGTTAACGATATATGCATTCAATTAATTTTAAATAAT  
ATTAAAATATCTTTTTGTTTTAAGACTCAAAGAGTCCCAATTAGGGTTTTCTATTTTGCAGAA  
CAGAAACAATGGTTTGGCAGAAGTGCGAGAAGAAGTTATCGAAGGTGATAGTAGCAGATAAGCAA  
TACCACCGAAGGCGGTGGTCGTAAGATGAACGAGAACAACTCCTCTCTAAGAAGAAAAGATGGA  
CTCCTTATGGAATACAAAGTGCATGATTGCAAGCAGCAAGTACACCAAGATGTCAAGTACTGCC  
ACACCTGTGCTTATACCAAAGGGGTTTTGTGCAATGTGTGGTAAGCAAGTACTTGATACAAAGCTT  
TGCAAGCAAAGCAATGTATAATCAAAGCAGATGCTATTTGGCATGTTGAAGTAGACCTAATGGT  
TTAGGGACTCTCGACTGTTTCAAGCTCAGTTGATCACTATCATTAACTTGCAGTATTGAACTGG  
GGTTGTAAAGTTCACCAACTGTTATGTAATGTAGTGGCATGCTTTGTAAGTTAATTCTTCCTGG  
GTAATGAAATATGATGGTAATAACTTCTCTGCATTCTCTTTTTACAAAAAATAAAATTAATTT  
AAAATATATCATTTAAATTAAGTTGATTGTTAAATTATAATCTATCACTATAATAATTTTTT  
ATAATTTGAGTTAGTTTTTTATTATTTTTCAGAATTTATCAATTTTAAATGTGTTATTTTAT  
AATTTTATATCAAAATTTGATTTTTAATATATACATATATATCTCATAATTTACATACTATT  
TAATTAATTTAAATAAATTGAAATAATAAAAATTATTATAACACGC

**Figure S11.** Schematic representation of the retrocopy “R\_cassava4.1\_019865m” encoded by the *M. esculenta* reference genome.

The figure convention follows Fig. S3A.

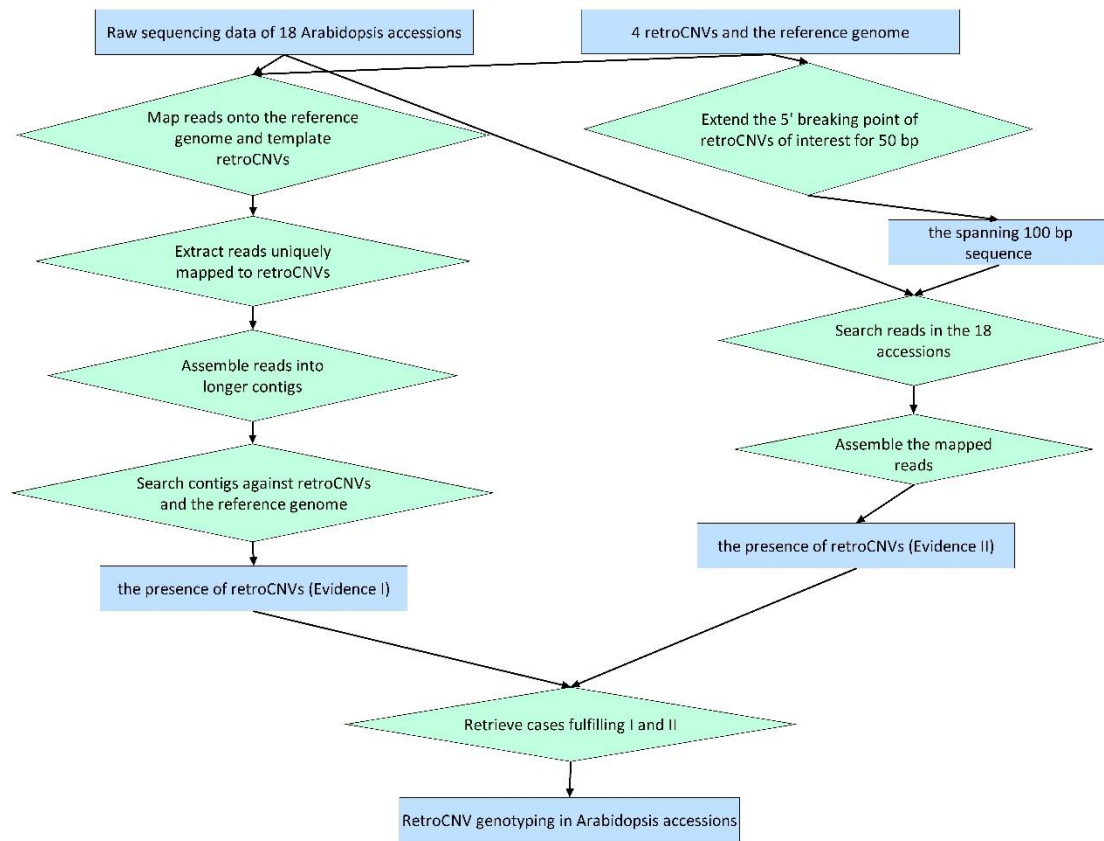

**Figure S12.** RetroCNV genotyping across Arabidopsis accessions.



## References in the Supplementary Information

1. Schridder, D. R., Stevens, K., Cardeno, C. M., Langley, C. H., & Hahn, M. W. Genome-wide analysis of retrogene polymorphisms in *Drosophila melanogaster*. *Genome Res* **21**, 2087-2095 (2011).
2. Schridder, D. R. *et al.* Gene copy-number polymorphism caused by retrotransposition in humans. *PLoS Genet* **9**, e1003242 (2013).
3. Gan, X. *et al.* Multiple reference genomes and transcriptomes for *Arabidopsis thaliana*. *Nature* **477**, 419-423 (2011).
4. Huala, E. *et al.* The *Arabidopsis* Information Resource (TAIR): a comprehensive database and web-based information retrieval, analysis, and visualization system for a model plant. *Nucleic Acids Res* **29**, 102-105 (2001).
5. Poole, R. L. The TAIR database. *Methods Mol Biol* **406**, 179-212 (2007).
6. Chevreux, B. *et al.* Using the miraEST assembler for reliable and automated mRNA transcript assembly and SNP detection in sequenced ESTs. *Genome Res* **14**, 1147-1159 (2004).
7. Kent, W. J. BLAT--the BLAST-like alignment tool. *Genome Res* **12**, 656-664 (2002).
8. Ruby, J. G., Bellare, P., & Derisi, J. L. PRICE: software for the targeted assembly of components of (Meta) genomic sequence data. *G3 (Bethesda)* **3**, 865-880 (2013).
9. Jurka, J. Repbase update: a database and an electronic journal of repetitive elements. *Trends Genet* **16**, 418-420 (2000).
10. Jurka, J. *et al.* Repbase Update, a database of eukaryotic repetitive elements. *Cytogenet Genome Res* **110**, 462-467 (2005).
11. Ouyang, S. & Buell, C. R. The TIGR Plant Repeat Databases: a collective resource for the identification of repetitive sequences in plants. *Nucleic Acids Res* **32**, D360-363 (2004).
12. Prochnik, S. *et al.* The Cassava Genome: Current Progress, Future Directions. *Trop Plant Biol* **5**, 88-94 (2012).
13. Rho, M., Choi, J. H., Kim, S., Lynch, M., & Tang, H. De novo identification of LTR retrotransposons in eukaryotic genomes. *BMC Genomics* **8**, 90 (2007).
14. Rho, M. & Tang, H. MGEScan-non-LTR: computational identification and classification of autonomous non-LTR retrotransposons in eukaryotic genomes. *Nucleic Acids Res* **37**, e143 (2009).
15. Li, W. & Godzik, A. Cd-hit: a fast program for clustering and comparing large sets of protein or nucleotide sequences. *Bioinformatics* **22**, 1658-1659 (2006).
16. Ma, J., Devos, K. M., & Bennetzen, J. L. Analyses of LTR-retrotransposon structures reveal recent and rapid genomic DNA loss in rice. *Genome Res* **14**, 860-869 (2004).
17. Abdelsamad, A. & Pecinka, A. Pollen-specific activation of *Arabidopsis* retrogenes is associated with global transcriptional reprogramming. *Plant Cell* **26**, 3299-3313 (2014).
18. Zhu, Z., Zhang, Y., & Long, M. Extensive structural renovation of retrogenes in the evolution of the *Populus* genome. *Plant Physiol* **151**, 1943-1951 (2009).
19. Zhang, Y., Wu, Y., Liu, Y., & Han, B. Computational identification of 69 retroposons in *Arabidopsis*. *Plant Physiol* **138**, 935-948 (2005).
20. Yang, Z. PAML: a program package for phylogenetic analysis by maximum likelihood. *Comput Appl Biosci* **13**, 555-556 (1997).

21. Betran, E., Thornton, K., & Long, M. Retroposed new genes out of the X in *Drosophila*. *Genome Res* **12**, 1854-1859 (2002).
22. Robinson, J. T. *et al.* Integrative genomics viewer. *Nat Biotechnol* **29**, 24-26.
23. Thorvaldsdottir, H., Robinson, J. T., & Mesirov, J. P. Integrative Genomics Viewer (IGV): high-performance genomics data visualization and exploration. *Brief Bioinform* **14**, 178-192.
24. Li, H. & Durbin, R. Fast and accurate short read alignment with Burrows-Wheeler transform. *Bioinformatics* **25**, 1754-1760 (2009).
25. Tamura, K. *et al.* MEGA5: molecular evolutionary genetics analysis using maximum likelihood, evolutionary distance, and maximum parsimony methods. *Mol Biol Evol* **28**, 2731-2739.
26. Kumar, S., Tamura, K., & Nei, M. MEGA: Molecular Evolutionary Genetics Analysis software for microcomputers. *Comput Appl Biosci* **10**, 189-191 (1994).
27. Edgar, R. C. MUSCLE: multiple sequence alignment with high accuracy and high throughput. *Nucleic Acids Res* **32**, 1792-1797 (2004).
